1 **Higher-order thalamocortical projections selectively control excitability via**  
2 **NMDAR and mGluRI-mediated mechanisms.**

3 Federico Brandalise\*<sup>a</sup>, Ronan Chéreau\*, Claudia Morin Raig, Tanika Bawa, Nandkishor Mule,  
4 Stéphane Pagès<sup>b</sup>, Foivos Markopoulos, Anthony Holtmaat<sup>#</sup>

5 Department of Basic Neurosciences and the Center for Neuroscience, Centre Médical  
6 Universitaire (CMU), University of Geneva, 1211 Geneva, Switzerland

7 <sup>a</sup>*Current address: Department of Biosciences, University of Milan, Via Celoria 26, 20133 Milan,*  
8 *Italy*

9 <sup>b</sup>*Current address: WYSS center, Campus Biotech, Geneva*

10 \*these authors contributed equally to this work

11 <sup>#</sup>corresponding author

12

13

14

15 **SUMMARY**

16

17 The apical dendrites of layer (L) 2/3 pyramidal neurons in the mouse somatosensory cortex  
18 integrate synaptic input from long-range projections. Among those, inputs from the higher-  
19 order thalamic posteromedial nucleus may facilitate sensory-evoked cortical activity, but it  
20 remains elusive how this role emerges. Here we show using *ex vivo* dendritic recordings that  
21 these projections provide dense synaptic input to broad tufted neurons residing  
22 predominantly in L2 and cooperate with other inputs to produce NMDA spikes. They have the  
23 unique capacity to block two-pore domain potassium leak channels via group 1 metabotropic  
24 glutamate receptor (mGluRI) signaling, which increases excitability. Slender tufted L2/3  
25 neurons and other long-range projections fail to invoke these mechanisms. *In vivo* imaging of  
26 calcium signals confirms the presence of mGluRI-dependent modulation of feedback-  
27 mediated spiking in L2. Our results imply that higher-order thalamocortical projections  
28 regulate neuronal excitability in a cell type and input-selective manner through fast NMDAR  
29 and mGluRI-dependent mechanisms.

30

## 31 INTRODUCTION

32

33 The neocortex consists of an intricate network of feedforward and feedback connections, but  
34 their topology and functional interactions remain enigmatic. Cortical pyramidal neurons  
35 receive distinct synaptic input, depending on their subtype and laminar location<sup>1</sup>. A striking  
36 example of spatially segregated inputs to pyramidal neurons is formed by first-order and  
37 higher-order parallel thalamocortical projections. In the mouse primary somatosensory  
38 cortex (S1), these projections are broadly yet distinctly distributed over all cortical layers<sup>2</sup>.  
39 First-order thalamocortical projections from the ventroposterior medial (VPM) thalamus  
40 target layer (L) 4 neurons and basal dendrites of thick-tufted L5b and L3 pyramidal neurons,  
41 whereas higher-order thalamocortical projections from the posteromedial nucleus (POm)  
42 mainly project to L5 and L1, targeting basal dendrites and apical tufts of L5a as well as the  
43 apical dendrites of L2/3 pyramidal neurons<sup>3-6</sup>. Within the L2/3 population, these inputs might  
44 be biased to L2 neurons<sup>6,7</sup>, but it remains unclear which factors determine this connectivity.

45 L2/3 pyramidal neurons comprise a morphologically heterogeneous population, with  
46 neurons in L2 often bearing extensive apical dendritic tufts, known as broad tufted (BT)  
47 neurons, and those in L3 with small tufts, known as slender tufted (ST) neurons<sup>8,9</sup>. However,  
48 in mice, the laminar position of pyramidal neurons does not strictly correlate with tuft  
49 complexity<sup>10</sup>. The different arrangements of L2/3 pyramidal neuron dendrites are likely to  
50 translate into differences in their connectivity, which typically correlates with the amount of  
51 axo-dendritic overlap formulated as Peters' rule<sup>11,12</sup>. Therefore, L2 BT neurons may receive  
52 more inputs from long-range axons in L1, whereas L3 ST neurons with disproportionately more  
53 basal dendrites may receive biased input from local axons and those terminating in L4 and  
54 L3<sup>13-15</sup>. Accordingly, some L2 neurons have been shown to receive relatively strong input from  
55 POm thalamocortical projections<sup>7</sup>, although this may not be a general principle for all L2  
56 neurons<sup>6</sup>. Peters' rule does not apply to all cortical networks. For example, intracortical  
57 connectivity of L2 pyramidal neurons is sometimes higher than predicted by axo-dendritic  
58 overlap, whereas the input from POm to L5b pyramidal neuron apical tufts in L1 is lower than  
59 expected<sup>4,16</sup>. Therefore, it remains unclear if axo-dendritic overlap is a good indicator for the  
60 input that L2/3 pyramidal neurons receive from POm afferents.

61 The connectivity patterns of POm projections suggest that they have distinct roles in  
62 the cortical circuitry. This is supported by the notion that synaptic responses evoked by

63 higher-order thalamocortical projections such as from POm, have signatures that are  
64 different from synaptic responses elicited by first-order thalamocortical or corticocortical  
65 projections<sup>17,18</sup>.

66 Glutamatergic pathways can be categorized into two groups, termed "drivers" and  
67 "modulators." Driver pathways, such as the pathway from VPM to S1, are linked to  
68 information-bearing pathways, whereas modulator pathways, such as the pathway from POm  
69 to S1, modify these primary information streams<sup>19,20</sup>. One distinction pertains to the presence  
70 of a metabotropic glutamate receptor (mGluR) component<sup>21,22</sup>, but it remains enigmatic how  
71 this affects synaptic integration in L2/3 pyramidal neurons. It has been proposed that POm  
72 facilitates sensory-evoked responses of pyramidal neurons subpopulations by eliciting long-  
73 lasting depolarizations<sup>23-28</sup>, but their underlying mechanisms also remain largely unknown.

74 Here, by combining electrophysiological dendritic patch-clamp recordings and  
75 optogenetics we show that L2/3 neurons with morphologically different dendritic trees  
76 receive biased inputs from long-range and local corticocortical circuits. POm thalamocortical  
77 synaptic inputs are dense on L2/3 BT neurons, whereas VPM thalamocortical synapses are  
78 biased to L2/3 ST neurons. BT neurons produce N-methyl-D-aspartate (NMDA) spikes when  
79 POm thalamocortical afferents are stimulated together with other afferents. In addition, we  
80 found that POm thalamocortical inputs are unique in their ability to elicit plateau potentials  
81 in BT neurons. This effect is mediated by the activation of group 1 mGluRs (mGluRI), which  
82 through an interaction with two-pore domain potassium (K2P) leak channels increase the  
83 local membrane input resistance. Using 2-photon laser scanning microscopy of calcium  
84 signals *in vivo*, we confirm that movement-related activity in these neurons, which is  
85 associated with recruitment of feedback circuits, is modulated through mGluRI-mediated  
86 mechanisms. We propose that higher-order thalamocortical projections regulate cortical  
87 sensory processing by gating the excitability of subpopulations of pyramidal neurons through  
88 fast and reversible NMDA receptor (NMDAR) and mGluRI-dependent mechanisms.

89

## 90 **RESULTS**

91

### 92 **Distinct long-range inputs to morphological subtypes of L2/3 pyramidal neurons**

93 To compare the relative net input provided by various long-range and local afferents on  
94 putatively different types of L2/3 pyramidal neurons, we expressed genetically encoded

95 opsins (ChR2 or ChrimsonR) in putative synaptic afferents using adeno-associated viral (AAV)  
96 vectors and recorded from L2/3 pyramidal neuron dendrites in brain slices. During the  
97 recordings, cells were filled with biocytin which allowed us to completely reconstruct the  
98 morphology of 27 cells for further analysis. To determine the spatial organization of the L2/3  
99 pyramidal neuron dendrites in L1 (Figure 1A and Figure S1) we measured the dendritic density  
100 and the span of the tree within the most superficial 200  $\mu\text{m}$  of the somatosensory cortex.  
101 Using  $k$ -means clustering, the neurons were segregated into two groups (Figure 1B), one with  
102 reduced and narrow dendritic trees, and one with dense and laterally spreading dendritic  
103 trees in L1. The first group typically exhibited a main apical branch extending perpendicular  
104 to the pia (Figure S1A), bearing similarities to the formerly reported ST neurons. The second  
105 group had dendrites that often originated from two main branches extending in an oblique  
106 way towards the pia, similar to the so-called BT neurons<sup>8,14,29</sup> (Figure S1A). In accordance,  
107 both the total length and the number of branches of apical dendrites was larger in BT than in  
108 ST neurons whereas the number of branches of basal dendrites was larger in ST than in BT  
109 neurons (Figure S1B,C). This resulted in a greatly different apical-to-basal ratio of both branch  
110 length and number between the two types (Figure S1B,C), which subsequently allowed us to  
111 classify neurons as BT or ST without extensive quantitative reconstructions. In addition,  
112 although individual neurons could not be classified as BT or ST neurons based on their laminar  
113 position (Figure S1A), the BT neurons were on average located more superficially as compared  
114 to ST neurons (Figure 1E), in accordance with previous observations<sup>14</sup>. Pia-aligned dendritic  
115 density heatmaps of the two groups indicate that at the population level BT neurons have an  
116 overall higher density of dendrites in the L1-L2 region of cortex, whereas ST neurons have  
117 slightly more dendritic material in L3 (Figure 1F, see also<sup>30</sup>). Passive electrophysiological  
118 parameters of BT and ST neurons were comparable, apart from the slow time constant and  
119 capacitance, which was likely a consequence of the morphological differences (Figure S1D,E).

120 To estimate the potential synaptic connectivity between long-range thalamocortical  
121 or corticocortical afferents and the two types of pyramidal neurons, we compared the laminar  
122 distribution of the opsin-labeled axons relative to the reconstructed dendritic trees (Figure  
123 1G,H,I). Thalamocortical afferents from POM and corticocortical afferents from the primary  
124 motor cortex (M1) and secondary somatosensory cortex (S2) overlapped more with BT  
125 dendrites, whereas thalamocortical afferents from VPM overlapped somewhat more with ST  
126 dendrites (Figure 1J).

127           According to Peters' rule<sup>11,12</sup>, the patterns of overlap as depicted in Figure 1 predict  
128 that BT neurons receive relatively more synaptic inputs from POm, M1 and S2 than ST neurons  
129 do, and vice versa, ST neurons should receive relatively more input from VPM in comparison  
130 to BT cells. We tested this hypothesis by recording postsynaptic potentials (PSPs) at the main  
131 apical dendrite of BT and ST neurons while photo-stimulating the various inputs using 5-ms  
132 light pulses (for labeling and recording strategies, see Methods; Figure 2A). Dendritic  
133 recordings were used since these are well suited for observing distal dendritic depolarization  
134 which readily attenuates toward the soma<sup>31-34</sup>. To account for the variability in the opsin  
135 expression levels and patterns over different preparations, we aimed at including both types  
136 in each slice to measure the relative synaptic input strength (Figure S2A). Together, this  
137 allowed comparisons of input strength from a particular afferent between nearby BT and ST  
138 neurons that were surrounded by a similar density of opsin-expressing axons (Figure S2B).  
139 The evoked PSP amplitudes increased monotonically with the amount of ChR2-GFP or  
140 ChrimsonR-tdTomato fluorescence (Figure S2C). Photo-stimulation of POm afferents evoked  
141 PSPs with higher amplitudes in BT neurons as compared to ST neurons (Figure 2B).  
142 Conversely, stimulation of VPM afferents evoked larger PSPs in ST neurons as compared to  
143 BT neurons. Stimulation of M1 and S2 afferents did not result in statistically different PSP  
144 amplitudes between the two types. We also tested the input strength from intracortical S1  
145 inputs (S1<sub>intracortical</sub>) and found no significant differences between the two types (Figure 2B).  
146 The PSP rise times were not different between the two types under any of the stimulation  
147 conditions (Figure S2D), indicating that the different PSP amplitudes between BT and ST  
148 neurons were not due to variations in the distance between the synaptic inputs and the  
149 recording sites. To verify that the observed POm and VPM-evoked PSPs included  
150 monosynaptic inputs, we bath-applied TTX and 4-AP in a subset of the recordings<sup>4</sup> (Figure  
151 S3A). The application did not abolish POm-evoked PSPs in BT and ST neurons, and VPM-  
152 evoked PSPs remained present in ST neurons (Figure S3B). However, the VPM-evoked PSPs in  
153 BT neurons were reduced to baseline noise-levels. This data indicates that the responses in  
154 ST neurons included monosynaptic PSPs from both POm and VPM, but that BT neurons only  
155 receive detectable monosynaptic inputs from POm. Therefore, the VPM-evoked PSPs in BT  
156 neurons were likely the result of polysynaptic circuit motifs.

157           To further investigate the different levels of thalamocortical input to the two groups  
158 of neurons, we utilized the anterograde trans-synaptic labeling properties of AAV1<sup>35</sup>. AAV1-

159 mCaMKII $\alpha$ -iCre-WPRE-hGHp(A) was injected in either the POm or VPM, and AAV2-hSyn-DIO-  
160 eGFP in S1 (Figure S4A). Owing to the trans-synaptic transport of the AAV1-Cre vector, GFP  
161 expression was driven in the neurons that held synaptic connections with thalamocortical  
162 axons. AAV1-Cre from the POm drove GFP expression predominantly in cortical L2/3 and L5  
163 neurons, whereas from the VPM it labeled cells in L4 and L2/3 (Figure S4B). The L2/3 neurons  
164 that were targeted by POm afferents were on average located closer to the pial surface than  
165 those targeted by VPM afferents (Figure S4C). Since BT neurons tend to be positioned more  
166 superficially in the cortex as compared to ST neurons (Figure 1E), these observations suggest  
167 that POm axons target predominantly BT neurons, whereas VPM axons are biased to ST  
168 neurons. This corroborates our electrophysiological findings showing that BT neurons  
169 received on average stronger synaptic input from POm, and ST neurons stronger input from  
170 VPM (Figure 2B).

171

### 172 **Inputs from POm afferents combined with other long-range synaptic inputs selectively** 173 **induce NMDAR-dependent responses in BT neurons**

174 Cortical L2/3 pyramidal neurons can integrate dendritic inputs in a supralinear manner,  
175 mediated by NMDARs, also called NMDA spikes<sup>23,33,36-39</sup>. These events are facilitated under  
176 depolarized conditions, when synapses are clustered, or when synapses harbor signaling  
177 mechanisms that strongly interact with one another<sup>40-43</sup>. L2/3 neurons have been shown to  
178 produce NMDA spikes upon sensory stimulation which may depend on inputs from POm and  
179 other afferents in L1<sup>23,39</sup>. Therefore, we sought to investigate whether the stimulation of  
180 different combinations of thalamocortical and corticocortical afferents have distinct  
181 propensities to produce NMDA spikes in BT and ST neurons. We expressed ChR2 and  
182 ChrimsonR in various pairs of putative presynaptic afferents and then performed dendritic  
183 recordings from either class in brain slices while photostimulating two afferents  
184 simultaneously (Figure 3A). We used light intensities and wavelengths that generated action  
185 potentials in the opsin-expressing neurons, but avoided cross-contamination between the  
186 two light channels (Figure S5, see<sup>44</sup>). The recorded dendrites were held at -55 mV to facilitate  
187 the generation of NMDA spikes. We first simultaneously photostimulated POm and M1  
188 afferents. In BT cells this evoked seemingly two types of PSPs, characterized by smaller and  
189 larger amplitudes (Figure 3B). The large-amplitude PSPs were prevented upon perfusion of  
190 the NMDAR antagonist APV, but the smaller amplitude PSPs remained unaffected. The large-

191 amplitude PSPs were also prevented when NMDAR opening was precluded by holding cells at  
192 hyperpolarized potentials ( $\sim -100\text{mV}$ ) (Figure S6A). Together, this confirms that the larger PSPs  
193 included NMDAR-mediated conductance and can be classified as NMDA spikes (Figure 3B).  
194 NMDA spikes were also observed in ST neurons upon stimulation of VPM and S1<sub>intracortical</sub>  
195 afferents (Figure S6B). To assess the efficacy by which various afferent pairs evoked NMDA  
196 spikes, we first determined whether the distribution of the evoked PSP amplitudes was  
197 bimodal (see methods, Figure 3B, and Figure S6). Then, for each combination of inputs and  
198 each cell type, *k*-means clustering was used to separate the NMDA spikes from the regular  
199 PSPs, from which the fraction of trials with NMDA spikes as well as their total strength  
200 (fraction multiplied by amplitude) were computed. This analysis revealed that co-stimulation  
201 of POm and M1 afferents had a higher capacity to evoke NMDA spikes in BT neurons as  
202 compared to ST neurons, as well as compared to the other tested combinations of putative  
203 inputs (Figure 3C). Most BT neurons also displayed NMDA spikes when POm and VPM  
204 afferents were co-stimulated. This is intriguing since we could not detect distinct  
205 monosynaptic inputs coming from VPM afferents onto BT neurons (Figure S3). It implies that  
206 the stimulation of POm afferents combined with VPM-mediated activation of local excitatory  
207 circuits such as from L4 and ST neurons, can generate NMDA spikes. The generation of NMDA  
208 spikes in ST neurons was most pronounced when VPM afferents and S1<sub>intracortical</sub> circuits were  
209 co-stimulated (Figure 3C). These data indicate that NMDA spikes can be evoked in L2/3  
210 pyramidal neurons upon combined stimulation of long-range synaptic input. This bears  
211 similarities to the NMDA spikes that have been reported in L4 upon combined thalamocortical  
212 and intracortical stimulation<sup>38</sup>, and the supralinear potentials in L2/3 pyramidal neurons upon  
213 sensory stimulation<sup>23,39</sup>. Our data show that these NMDA spikes are L2/3 neuron type and  
214 input selective.

215

### 216 **Inputs from POm afferents evoke plateau potentials in BT cell dendrites**

217 While we assessed the functional connectivity of long-range inputs onto L2/3 pyramidal  
218 neurons, we observed that optogenetic stimulation of POm afferents using a train of 5 pulses  
219 (8Hz) evoked sustained plateau-like depolarizations that followed the 5 short-latency PSPs  
220 with long and variable delays (Figure 4A). Such events were virtually absent upon stimulation  
221 of other afferents.

222 To better characterize these events, we compared pairs of inputs on BT and ST  
223 neurons from Chr2 and ChrimsonR expressing afferents, which were independently tested at  
224 least 10 times by interleaving the two optogenetic stimuli every 10 s. Dendritic recordings  
225 from BT neurons systematically displayed long-lasting depolarizing potentials following  
226 optogenetic stimulation of P<sub>Om</sub> but not of VPM (Figure 4A). We did not observe this in ST  
227 neurons (Figure 4F). To quantitatively assess these events, we designed a filter to detect any  
228 depolarization that occurred after the 5 stimuli, and then measured their durations and  
229 amplitudes. Stimulation of P<sub>Om</sub> afferents often evoked large-amplitude and long-lasting  
230 events, which were not seen after stimulation of M1, S2, and VPM (Figure 4B). The cumulative  
231 distribution of the event durations indicates that inputs from P<sub>Om</sub> consistently produced  
232 longer-lasting events as compared to the other inputs (Figure 4C). A similar analysis of the  
233 recordings from ST neurons did not reveal differences in the cumulative distribution of event  
234 durations between the P<sub>Om</sub> stimulation and any other inputs (Figure 4F,G).

235 These long-lasting depolarizations were clearly distinct from regular PSPs and NMDA  
236 spikes. Their average duration, rise time, and amplitudes were significantly different from the  
237 NMDA spikes seen upon combined stimulation of inputs (Figure S7). Together, this indicates  
238 that these events were very unlikely to represent spontaneous AMPAR-mediated PSPs or  
239 NMDA spikes. To distinguish them from NMDA spikes, we termed them plateau potentials for  
240 the remainder of the paper.

241 The probability of detecting plateau potentials (>200ms) in BT neurons after  
242 stimulation of P<sub>Om</sub> afferents was significantly higher than after stimulation of any of the  
243 other inputs (Figure 4D). Even though they sporadically arose after stimulation of the other  
244 inputs, their probability was not significantly above zero (Figure 4D). Thus, the increased  
245 frequency of plateau potentials appeared exclusively associated with stimulation of P<sub>Om</sub>  
246 afferents (Figure 4E). The increase in plateau potential frequency was independent of the  
247 short duration event frequency, which was not different between P<sub>Om</sub> and other afferent  
248 stimulation (Figure 4E). Stimulation of P<sub>Om</sub> afferents did not increase their probability in ST  
249 neurons (Figure 4H) as compared to other afferent stimuli, and no difference was found when  
250 comparing the frequency of plateau potentials and short-lasting events (Figure 4I). Moreover,  
251 when comparing the VPM and S1<sub>intracortical</sub>, we almost exclusively found short-lasting events  
252 and the measured frequencies of plateau potentials were close to zero (Figure 4J). In addition,  
253 BT neurons in M1 did not produce any plateau potentials upon optogenetic stimulation of



254 POM afferents (Figure S8). Together, these results indicate that plateau potentials  
255 predominantly occurred in S1 BT neurons and were selectively associated with the  
256 stimulation of POM inputs.

257

### 258 **Plateau potentials depend on the closing of leak K<sup>+</sup> channels**

259 Since the plateau potentials were so distinct from any of the other events, we hypothesized  
260 that they were associated with the opening or closing of ion channels other than the typical  
261 synaptic receptors. To investigate the conductance that was mediating the plateau potentials,  
262 we recorded from BT neurons while optogenetically stimulating POM afferents and holding  
263 the membrane potential at -60, -100 and -125 mV (Figure 5A). Whereas the plateau  
264 potentials were depolarizing at -60 mV, they nearly disappeared at -100 mV and became  
265 hyperpolarizing at -120 mV. We inferred that the reversal potential of these events was  
266 around -104 mV (Figure 5B). This is consistent with a potassium conductance, which under  
267 our experimental conditions was estimated to be around -100 mV (see methods). Considering  
268 that plateau potentials were detected as depolarizing at resting membrane potentials, we  
269 deemed it unlikely that they were mediated by the opening of hyperpolarizing and voltage-  
270 dependent potassium channels. Instead, we hypothesized that they were mediated by leak  
271 potassium channels that regulate resting membrane potentials, the majority of which is  
272 formed by the K2P channel family<sup>45</sup>. Under our experimental conditions, the plateau  
273 potentials would thus reflect the transient closing of the K2P channels. To test this, we  
274 performed dendritic recordings of BT neurons, while optogenetically stimulating POM  
275 afferents. We measured the plateau potential frequency before and after bath application of  
276 a broad-spectrum cocktail of K2P channels blockers<sup>46</sup> (Figure 5C). Consistent with the  
277 hypothesis, the blocking of these channels significantly reduced the frequency of plateau  
278 potentials (Figure 5C,D). To narrow down which K2P channel subtypes could be involved, we  
279 tested the effect of more specific antagonists in a different set of experiments. Blocking TASK  
280 or TREK channels by bath application of A1899 or fluoxetine significantly reduced the plateau  
281 potentials frequency, whereas the blocking of THIK-1 channels by IBMX did not affect them  
282 (Figure 5G). Finally, the blocking of K2P channels by any of these means increased the  
283 membrane resistance of the recorded neurons (Figure 5F), suggesting that the effects were  
284 cell autonomous.

285

286 **Plateau potentials in POM to BT synaptic inputs are mediated by post-synaptic group I**  
287 **mGluRs**

288 We next sought to investigate how the activation of POM to BT synaptic inputs leads to the  
289 blocking of TASK/TREK channels. TASK and TREK channels have been shown to be modulated  
290 by G protein-coupled receptor (GPCR) signaling pathways<sup>47,48</sup>. The mGluRs have been shown  
291 to induce delayed and long-lasting depolarizing events resembling the ones observed in our  
292 recordings<sup>21,22,49</sup>. Therefore, we hypothesized that the activation of POM to BT synaptic inputs  
293 triggers mGluRI-signaling which subsequently mediates the transient closing of TASK or TREK  
294 channels. To test this, we performed another set of dendritic recordings on BT neurons and  
295 measured the frequency of plateau potentials following POM stimulation before and after  
296 bath perfusion of specific and generic mGluRI blockers, LY367385 and MCPG respectively  
297 (Figure 6A). Blocking mGluRs significantly reduced the frequency of plateau potentials,  
298 similar to the effect of blocking of K2P channels (Figure 6A,B). To confirm that the effects  
299 sorted by LY367385 and MCPG were mediated by postsynaptic mGluRI, we added GDP- $\beta$ -S to  
300 the intracellular solution (Figure 6D). GDP- $\beta$ -S is a non-hydrolyzable analog of GDP that  
301 internally blocks G-protein activity<sup>17,50</sup>. Whereas optogenetic stimulation of POM still induced  
302 plateau potentials immediately after break-in with the patch electrode, the events were  
303 largely abolished within approximately 3 minutes (Figure 6D,E), which is consistent with the  
304 dialysis kinetics of GDP- $\beta$ -S<sup>51</sup>. Overall, the presence of mGluRs or G-protein blockers slightly  
305 decreased the membrane resistance of all recorded neurons (Figure 6C,F). Conversely, the  
306 bath application of the mGluRI agonist DHPG increased both the frequency and the amplitude  
307 of plateau potentials triggered by POM stimulation, along with an increase in the input  
308 resistance (Figure S9A-C). This effect was absent in ST neurons (Figure S9D,E). Taken together,  
309 these experiments indicate that plateau potentials are mediated by the signaling of  
310 postsynaptic mGluRs at the POM to BT synaptic inputs.

311

312 **Modulation of mGluRs alters movement-associated spiking of L2/3 neurons *in vivo***

313 mGluRI-mediated plateau potentials and the associated increase in input resistance may  
314 represent a mechanism for increasing the gain of concomitant synaptic inputs. Indeed,  
315 occasionally action potentials were superimposed on the plateau potentials (Figure 4A). To  
316 further investigate this, we performed dendritic recordings of BT neurons while bath applying  
317 TBOA, a glutamate-reuptake inhibitor that prolongs the presence of ambient glutamate in

318 (and around) the synapse. Under these conditions, the optogenetic stimulation of POM  
319 afferents increased the occurrence of action potentials that were superimposed on the  
320 plateau potentials (Figure S10A,B). This effect was absent upon stimulation of M1 afferents,  
321 despite the amplifying effect of TBOA on the evoked PSPs (Figure S10C). This suggests that  
322 the plateau potentials are the leading cause for the increased occurrence of action potentials,  
323 which could trigger NMDAR-mediated events, as previously reported<sup>52,53</sup>. Affirmatively, the  
324 high amplitude plateau potentials and spikes disappeared when NMDARs were blocked by  
325 adding APV to the bath, but this did not impact the duration of the plateau potentials (Figure  
326 S10A,B). These could only be removed by an additional inhibition of mGluRI (Figure S10A,B).  
327 Altogether, the data indicate that under a prolonged presence of glutamate – a phenomenon  
328 that may mimic conditions as they occur during bursting activity, mGluRI-mediated plateau  
329 potentials may promote the generation of somatic action potentials.

330         These observations incited us to explore how the modulation of mGluRI affects the  
331 activity of cortical neurons *in vivo*. Mice actively use their whiskers to sense their  
332 environment, which consists of volitional movements that are in part initiated by activity in  
333 motor cortices, among which M1<sup>54</sup>. Neurons in the vibrissal area of M1 encode whisking  
334 parameters during active sensing behavior, and this activity is subsequently transmitted back  
335 to L1 of S1<sup>55</sup>. Based on our observations, we argued that POM-mediated activation of mGluRI  
336 could selectively increase the gain of incoming motor signals from M1 onto BT neurons.  
337 Therefore, we hypothesized that mGluRI-mediated subthreshold plateau potentials in S1 L2/3  
338 pyramidal neurons increase the propensity for active whisking to induce somatic spikes. To  
339 investigate this, we performed *in vivo* 2-photon laser scanning microscopy to image calcium  
340 ( $\text{Ca}^{2+}$ ) signals in S1 L2/3 neurons expressing GCaMP6s.  $\text{Ca}^{2+}$  signals were recorded before and  
341 after modulating mGluRIs using the local infusion of the agonist DHPG or the antagonist  
342 MCPG (Figure 7). Using a piezo-driven microscope objective, we imaged near-simultaneously  
343 the upper and lower L2/3 neurons (at -100 and -300  $\mu\text{m}$  distance from the pia, respectively;  
344 Figure 7A). For the analysis, we assumed that the population of BT neurons is enriched in  
345 upper L2/3 while the location of ST neurons is more biased towards deeper L2/3 (Figure 1E).  
346 We first compared the level of the overall activity of individual neurons in upper and lower  
347 L2/3 before and after DHPG (Figure 7B,D,E) or MCPG infusion (Figure 7C,F,G). DHPG increased  
348 the overall activity of L2/3 neurons but more so in upper L2/3 (Figure 7D,E). MCPG modestly  
349 increased the overall activity, but substantially suppressed activity of a subset of upper L2/3

350 neurons (Figure 7F,G). We tracked snout movements as a proxy of whisking<sup>56</sup> using  
351 DeepLabCut<sup>57</sup>. A random forests decoding algorithm was trained to predict snout movements  
352 from the activity of individual neurons (Figure 7H,I). The correlation coefficient between the  
353 predicted and actual movements, which we defined as the prediction power (PP), was  
354 calculated for each neuron before and after infusion of the drugs (Figure 7J-M). While the  
355 average PP of upper and lower L2/3 neurons was similar in baseline conditions, we found that  
356 DHPG significantly increased the PP for upper but not for lower L2/3 (Figure 7J,K). Conversely,  
357 MCPG significantly decreased the PP of upper but not of lower L2/3 neurons (Figure 7L,M). In  
358 addition, the PP of upper L2/3 neurons under control conditions moderately correlated with  
359 the magnitude of increase in activity under DHPG, and strongly correlated with the reduction  
360 in activity under MCPG. This was not observed for lower L2/3 neurons (Figure S11).  
361 Altogether, these results indicate that mGluRI signaling in a subset of upper L2/3 neurons  
362 increases their propensity to produce spikes during whisking.

363

364 **DISCUSSION**

365

366 We showed that activation of thalamocortical projections to S1 L2/3 pyramidal neurons from  
367 the POm promotes the generation of NMDA spikes when combined with other inputs. POm  
368 thalamocortical inputs also have the capacity to evoke plateau potentials via a mGluRI-  
369 mediated modulation of K2P channels. These effects are selective for a subpopulation of  
370 pyramidal neurons with broad apical tufts which are predominantly located in L2. Both  
371 phenomena actively increase neuronal excitability, which may augment these neurons'  
372 propensity to trigger spikes. We found support for this mechanism *in vivo* by demonstrating  
373 that mGluRI signaling preferentially modulates movement-associated spiking of L2 pyramidal  
374 neurons in S1.

375

376 **POm thalamocortical projections preferentially connect with L2/3 BT neurons**

377 Using an unbiased classification, we clustered L2/3 pyramidal neurons in two groups, one with  
378 broad and dense apical tufts, and another with slender tufts (Figure 1). The morphological  
379 characteristics of these populations are very similar to previously reported BT and ST  
380 neurons<sup>8,9</sup>. Our experiments show that the extent and density of their dendrites were good  
381 indicators of the synaptic connectivity with the axons that overlapped with them (Figure 2),  
382 which is in line with Peters' rule stating that synaptic connections are proportional to the axo-  
383 dendritic overlap<sup>12</sup>. Stimulation of POm, M1 and S2 axons all tended to evoke larger PSPs in  
384 BT as compared to ST neurons, although the S2 and M1 functional inputs were not  
385 significantly different between both cell types. In contrast, stimulation of VPM and  
386 intracortical circuits evoked larger PSPs in the ST neurons which have a higher proportion of  
387 basal dendrites. We verified that this relationship was also present at the level of  
388 monosynaptic inputs between these neurons and POm or VPM axons (Figure S3). We did not  
389 perform this experiment for S2 and M1 afferents. Therefore, we cannot exclude that the lack  
390 of discrimination between those inputs onto BT and ST neurons was due to abundant  
391 polysynaptic connections from local corticocortical circuitry that may be activated by these  
392 pathways. The relatively strong connectivity between L1 afferents and BT neurons is in line  
393 with the notion that many L2 neurons in S1 and L2/3 neurons in V1 bearing complex dendritic  
394 arbors have relatively large receptive fields, since many L1 inputs derive from long-range  
395 projections originating from various brain regions<sup>7,25,58</sup>.

396           The high connectivity rates of POm afferents with L2/3 BT neurons stand in contrast  
397 with the relatively low connectivity rates of those afferents with the abundantly present  
398 branches from broad tufted L5b neuron apical dendrites in L1, and the high rates with less  
399 abundant slender L5a neurons<sup>4</sup>. Thus, POm afferents provide input selectively to L2 BT  
400 neurons and L5a pyramidal neurons, which are highly interconnected<sup>1,3,16</sup>. This suggests that  
401 together they constitute a paralemniscal cortical circuit motif with distinct functions<sup>59</sup>. It is  
402 also interesting to note that the high connectivity rates of L2 neurons (i.e. L2/3 BT neurons)  
403 with POm afferents are associated with higher-than-average levels of plasticity<sup>25,59,60</sup>.  
404 However, there is no indication that the BT neuronal subtypes should generally display higher  
405 levels of activity *in vivo*<sup>9</sup>.

406

#### 407 **Converging POm and M1 inputs on L2/3 BT neurons cooperate to generate NMDA spikes**

408 NMDA spikes were readily generated in BT neurons when POm afferents were co-stimulated  
409 with inputs from M1 and VPM, but not upon co-stimulation of VPM and S1<sub>intracortical</sub> afferents  
410 (Figure 3). Conversely, NMDA spikes were abundant in ST neurons upon co-stimulation of  
411 VPM and S1<sub>intracortical</sub> afferents but not when POm afferents were co-stimulated with those  
412 from M1 or VPM. Co-stimulation of POm and S2 afferents did not produce a significant  
413 number of NMDA spikes in either BT or ST neurons. The efficacy at which POm together with  
414 M1, and VPM together with S1<sub>intracortical</sub>, evoked NMDA spikes in BT and ST neurons,  
415 respectively, indicates that their synapses bolster supralinear synaptic interactions. Well  
416 known parameters for such interactions are synaptic proximity, the caliber of the parent  
417 dendrite, synaptic receptor content, the temporal order of activation, and the levels of local  
418 inhibitory and neuromodulatory input<sup>37</sup>. Favoring conditions are indeed met for the synaptic  
419 inputs of some of the above afferents. POm and M1 afferents both are likely to have dense  
420 connections with the apical dendrites of BT pyramidal neurons in L1, and VPM and S1<sub>intracortical</sub>  
421 afferents may densely connect with basal dendrites of ST pyramidal neurons in L3. Thus, the  
422 occurrence of NMDA spikes may be related to the convergence of these inputs onto single  
423 dendritic domains, which aligns with models in which clustered inputs favor supralinear  
424 synaptic integration<sup>61-65</sup>. In this respect, the finding that co-stimulation of POm and VPM  
425 afferents also evoked NMDA spikes in BT neurons was surprising, since VPM axons had  
426 virtually no monosynaptic connections with them. The most likely explanation for this finding  
427 is that they were triggered by the activation of polysynaptic L4-to-L2/3 and L2/3-to-L2/3

428 circuits that are readily recruited by VPM inputs, and which are more broadly distributed  
429 along the dendrites. In addition to their convergence, another favoring condition for NMDA  
430 spikes is provided by the location of P<sub>Om</sub> synaptic inputs on thin distal endings of the apical  
431 branches<sup>66</sup>, which may increase their cooperativity with other inputs<sup>42</sup>. In support of this,  
432 NMDA-mediated synaptic Ca<sup>2+</sup> responses can readily be observed in distal dendritic branches  
433 <sup>23,39</sup>. In a similar vein, the generation of NMDA spikes in ST neurons could be explained by the  
434 projection of VPM afferents onto their thin basal dendrites which are also favorable for  
435 evoking dendritic spikes<sup>67,68</sup>. A similar supra-linear interaction between VPM and local inputs  
436 has been described for L4 granule cells<sup>38</sup>. Furthermore, co-stimulation of P<sub>Om</sub> afferents with  
437 local ascending cortical circuitry has been shown to drive disinhibition of L2/3 neurons<sup>26</sup>. This  
438 could aid the generation of NMDA spikes, which are highly sensitive to dendritic inhibition<sup>69</sup>.  
439 Modeling studies indeed suggest that disinhibition could gate the generation of NMDA spikes  
440 evoked by clustered inputs<sup>70</sup>. L2 pyramidal neurons receive substantial inhibition and could  
441 thus be powerfully controlled by such a mechanism<sup>71</sup>. Lastly, the various inputs that we tested  
442 could harbor temporally different synaptic activation patterns, which have been shown to be  
443 critical for supra-linear synaptic integration<sup>72</sup>. Further experiments are needed to reveal if  
444 such relationships exist between long-range synaptic inputs to apical dendrites in L1.

445 Even though NMDA spikes often remain below the main spiking threshold, they are  
446 important for facilitating spikes initiated at the axon initial segment. Dendritic NMDAR-  
447 mediated events *in vivo* have been correlated with increased somatic spiking  
448 probabilities<sup>38,39,73</sup>. Thus, P<sub>Om</sub> afferents may modulate activity of BT neurons through  
449 facilitating the generation of NMDA spikes in collaboration with other inputs. Subthreshold  
450 NMDAR-events have also been shown to drive synaptic plasticity<sup>23,43,74</sup>, and previous work  
451 from our laboratory indicates that in L2/3 neurons this depends on input from the P<sub>Om</sub>.  
452 Combined with the current insights this suggests that P<sub>Om</sub>-mediated plasticity might be an  
453 attribute of L2/3 BT neurons. It will be interesting to investigate whether this relates to  
454 aspects of sensory learning.

455

#### 456 **Stimulation of P<sub>Om</sub> afferents modulates K<sub>2P</sub> leak channels through mGluR1 signaling**

457 P<sub>Om</sub> stimulation *in vivo* has been shown to evoke sustained depolarizations in L2/3 and L5  
458 neurons *in vivo*, which in turn may prolong their sensory-evoked responses<sup>23-25,27</sup>.  
459 Reverberatory activity in L2 is likely evoked through a combination of L5-to-L2 and direct

460 POM-to-L2 inputs<sup>25,59</sup>. POM-mediated NMDA spikes may in part explain such effects, but  
461 additional biophysical mechanisms for these phenomena are likely at play given the long-  
462 lasting effects seen in the studies above (Figure S10). Upon a burst of POM stimuli we  
463 observed abrupt depolarizations specifically in BT neurons, which were temporally unlocked  
464 from the stimulus onset and varied in duration (Figure 4). These potentials were very distinct  
465 from PSPs and synaptic NMDA spikes (Figure S7). Instead, they had similar kinetics to  
466 previously reported local glutamate-evoked dendritic plateau potentials that were sustained  
467 at 10 to 20 mV for 200-500 ms<sup>53,75</sup>. In these studies, the potentials propagated to the cell body  
468 where they could trigger a burst of action potentials, an effect that we did not further  
469 investigate in brain slices. Surprisingly, in our experiments, we found that plateau potentials  
470 were mediated by mGluRI, which modulated K2P channels through a G-protein-triggered  
471 mechanism (Figure 5 and 6). Our results point to a mechanism involving TASK and TREK K2P  
472 channels, but other channels could play a role as well since our pharmacological screen could  
473 not exhaustively test specific interactions.

474         Although this mechanism may seem surprising, it does align with other observations.  
475 First, synaptic responses elicited by strong higher-order thalamocortical stimuli were shown  
476 to consistently contain mGluRI components<sup>21,22</sup>. Second, activation of mGluRs in neocortex  
477 and hippocampus is known to modulate various K<sup>+</sup> channels<sup>76-81</sup>, although Ca<sup>2+</sup> and other  
478 channels can also be affected<sup>82</sup>. Third, signaling pathways from mGluRs to K2P channels have  
479 been identified using reduced expression systems<sup>83,84</sup> and in cerebellum granule cells<sup>47,48,85</sup>.

480         K2P channels are responsible for leak and background currents, which are largely  
481 voltage-independent<sup>86,87</sup>. As such, they play an important role in regulating the resting  
482 membrane potential and hence a neuron's excitability. By reducing the number of  
483 background potassium channels that are in an open state, mGluR signaling could depolarize  
484 the membrane by a few mV. The metabotropic action of the receptors together with their  
485 extrasynaptic location might make this a delayed, slow, yet all-or-nothing effect. The delays  
486 and the kinetics of the plateau potentials that we detected upon POM stimulation are  
487 consistent with such a mechanism. It is important to note that the interaction between mGluR  
488 and K2P are intricate, and may involve antagonistic signaling cascades<sup>47,48</sup>. It will be  
489 interesting to investigate if the various interactions depend on the molecular composition  
490 and if they are selective for synaptic or neuronal types. Furthermore, other GPCR-signaling  
491 pathways may also converge onto the K2P channels, e.g. through cholinergic signaling<sup>48</sup>.



492 Our observation that the mGluRI-mediated modulation of the K2P channels only  
493 occurred for POM-to-BT inputs, and not by neighboring long-range synaptic inputs, suggests  
494 that selectivity is regulated at the synaptic level. A combination of postsynaptic scaffold  
495 proteins may selectively recruit mGluRs, or their precise localization could be regulated  
496 through trans-synaptic interactions similar to the recruitment of presynaptic mGluR7<sup>88</sup> –  
497 although such interactions have as yet not been described for mGluR1 or 5. Synapse  
498 selectivity could also emerge from differential expression and trafficking of K2P family  
499 members or the intermediate signaling molecules<sup>87,89</sup> – although it is not clear whether  
500 localization can also be dendritic domain-specific.

501

### 502 **The role of POM-mediated mGluR signaling in regulating excitability**

503 The POM evoked mechanisms could increase the excitability of pyramidal neurons in  
504 two ways. First, the dendritic plateau potentials bring the resting membrane potential into a  
505 more depolarized state, which may increase the probability that coinciding EPSPs cross the  
506 spiking threshold. In this respect, the POM-driven plateau potentials are comparable to the  
507 cortical up-states that were previously reported upon optogenetic stimulation of  
508 thalamocortical circuits<sup>90</sup>. Second, the modulation of K<sup>+</sup> channels may facilitate the  
509 transformation of electrogenic events originating in individual dendrites into global dendritic  
510 activity (i.e. simultaneous depolarizations in many dendrites)<sup>33,91</sup>, which may promote the  
511 generation of action potentials<sup>92–95</sup>. Indeed, dendritic K<sup>+</sup> conductance has been shown to  
512 inhibit the initiation of local supralinear events, prevent the backpropagation of action  
513 potentials into the dendrites, dampen excitatory synaptic events, and more generally,  
514 decouple the dendritic from the somatic compartment<sup>94,96</sup>. Interestingly, thalamic activation  
515 (POM) of mGluRI has been found to be necessary for the coupling between the dendrites and  
516 soma of L5 pyramidal neurons<sup>97,98</sup>. Together with our findings, these observations suggest  
517 that a POM-driven block of K2P-conductance increases the excitability of distal dendritic  
518 compartments and thereby increases the transfer of depolarizations caused by other distal  
519 inputs from the dendrites to the soma. Overall, this aligns with studies showing that the  
520 activation of the POM causes a general increase in cortical excitability of the barrel cortex<sup>24,66</sup>,  
521 and that the activation of postsynaptic mGluR5 receptors induces persistent firing in the  
522 prefrontal cortex<sup>99</sup>. Also, in line with these findings, we found that the local injection of  
523 mGluRI agonists and antagonists *in vivo* bidirectionally affected movement-associated activity

524 of L2 neurons. In particular, the movement-related prediction from L2 neurons' activity  
525 increased upon the presence of mGluRI agonists and decreased with antagonists (Figure 7).  
526 This strongly suggests that L2 pyramidal neuron activity, which likely depends on active  
527 feedback loops among others from POm, is mediated by mGluRI-associated mechanisms;  
528 possibly through the modulation of K2P channel opening. The regulation of excitability and  
529 dendritic coupling of various pyramidal neurons might rely on this mechanism. Recent work  
530 by the Larkum laboratory has shown that anesthetics cause dendritic decoupling and propose  
531 that this could be the underlying mechanism for the loss of consciousness<sup>98</sup>. Interestingly, K2P  
532 channels have been found to be positively modulated by some anesthetics<sup>100,101</sup>. This implies  
533 that POm inputs to L5 and L2/3 may play an important role in modulating levels of  
534 consciousness, which could even be a general feature of higher-order thalamocortical inputs  
535 to various cortical areas.

536

### 537 **ACKNOWLEDGMENTS**

538 We would like to express our gratitude to Dr. Fodoulian for generously providing the random  
539 forests code, which significantly enriched the computational aspects of our manuscript. We  
540 also want to extend the appreciation to the entire Holtmaat group for their valuable  
541 comments and constructive feedback, which have been instrumental in shaping and refining  
542 the development of this project. We would like to thank Elodie Husi, Sébastien Pellat and  
543 Raphaël Thurnherr for their technical support.

544 This work was supported by the Swiss National Foundation Grant Numbers 31003A\_173125  
545 and 310030\_204562.

546

### 547 **AUTHOR CONTRIBUTIONS**

548 Conceptualization, F.B., R.C. and A.H.; Methodology, F.B., R.C., F.M., S.P. and A.H.;  
549 Investigation, F.B., R.C., C.M. and N.M.; Formal Analysis, F.B., R.C., T.B.; Resources, A.H.;  
550 Writing – Original Draft, F.B., R.C. and A.H.; Writing – Review & Editing, F.B., R.C. and A.H.;  
551 Visualization, F.B., R.C. and A.H.; Funding Acquisition, A.H.; Supervision, A.H.

552

### 553 **DECLARATION OF INTERESTS**

554 The authors declare no competing interests.

555

556 **REFERENCES**

557

- 558 1. Harris, K.D., and Shepherd, G.M.G. (2015). The neocortical circuit: themes and  
559 variations. *Nat Neurosci* 18, 170–181. 10.1038/nn.3917.
- 560 2. Clascá, F., Rubio-Garrido, P., and Jabaudon, D. (2012). Unveiling the diversity of  
561 thalamocortical neuron subtypes. *Eur J of Neuroscience* 35, 1524–1532.  
562 10.1111/j.1460-9568.2012.08033.x.
- 563 3. Bureau, I., Von Saint Paul, F., and Svoboda, K. (2006). Interdigitated Paralemniscal and  
564 Lemniscal Pathways in the Mouse Barrel Cortex. *PLoS Biol* 4, e382.  
565 10.1371/journal.pbio.0040382.
- 566 4. Petreanu, L., Mao, T., Sternson, S.M., and Svoboda, K. (2009). The subcellular  
567 organization of neocortical excitatory connections. *Nature* 457, 1142–1145.  
568 10.1038/nature07709.
- 569 5. Audette, N.J., Urban-Ciecko, J., Matsushita, M., and Barth, A.L. (2018). P<sub>0</sub>M  
570 Thalamocortical Input Drives Layer-Specific Microcircuits in Somatosensory Cortex.  
571 *Cerebral Cortex* 28, 1312–1328. 10.1093/cercor/bhx044.
- 572 6. Sermet, B.S., Truschow, P., Feyerabend, M., Mayrhofer, J.M., Oram, T.B., Yizhar, O.,  
573 Staiger, J.F., and Petersen, C.C. (2019). Pathway-, layer- and cell-type-specific thalamic  
574 input to mouse barrel cortex. *eLife* 8, e52665. 10.7554/eLife.52665.
- 575 7. Jouhanneau, J.-S., Ferrarese, L., Estebanez, L., Audette, N.J., Brecht, M., Barth, A.L., and  
576 Poulet, J.F.A. (2014). Cortical fosGFP Expression Reveals Broad Receptive Field  
577 Excitatory Neurons Targeted by P<sub>0</sub>M. *Neuron* 84, 1065–1078.  
578 10.1016/j.neuron.2014.10.014.
- 579 8. Feldmeyer, D. (2012). Excitatory neuronal connectivity in the barrel cortex. *Front.*  
580 *Neuroanat.* 6. 10.3389/fnana.2012.00024.
- 581 9. Barz, C.S., Garderes, P.M., Ganea, D.A., Reischauer, S., Feldmeyer, D., and Haiss, F.  
582 (2021). Functional and Structural Properties of Highly Responsive Somatosensory  
583 Neurons in Mouse Barrel Cortex. *Cerebral Cortex* 31, 4533–4553.  
584 10.1093/cercor/bhab104.
- 585 10. Araya, R. (2022). Dendritic Morphology and Function. In *Neuroscience in the 21st*  
586 *Century*, D. W. Pfaff, N. D. Volkow, and J. L. Rubenstein, eds. (Springer International  
587 Publishing), pp. 571–606. 10.1007/978-3-030-88832-9\_13.
- 588 11. Peters, A., Proskauer, C.C., Feldman, M.L., and Kimerer, L. (1979). The projection of the  
589 lateral geniculate nucleus to area 17 of the rat cerebral cortex. V. Degenerating axon  
590 terminals synapsing with Golgi impregnated neurons. *J Neurocytol* 8, 331–357.  
591 10.1007/BF01236125.
- 592 12. Braitenberg, V., and Schüz, A. (2013). *Cortex: Statistics and Geometry of Neuronal*  
593 *Connectivity* (Springer Berlin Heidelberg).

- 594 13. Meyer, H.S., Wimmer, V.C., Oberlaender, M., De Kock, C.P.J., Sakmann, B., and  
595 Helmstaedter, M. (2010). Number and Laminar Distribution of Neurons in a  
596 Thalamocortical Projection Column of Rat Vibrissal Cortex. *Cerebral Cortex* 20, 2277–  
597 2286. 10.1093/cercor/bhq067.
- 598 14. Oberlaender, M., De Kock, C.P.J., Bruno, R.M., Ramirez, A., Meyer, H.S., Dercksen, V.J.,  
599 Helmstaedter, M., and Sakmann, B. (2012). Cell Type–Specific Three-Dimensional  
600 Structure of Thalamocortical Circuits in a Column of Rat Vibrissal Cortex. *Cerebral*  
601 *Cortex* 22, 2375–2391. 10.1093/cercor/bhr317.
- 602 15. Udvary, D., Harth, P., Macke, J.H., Hege, H.-C., De Kock, C.P.J., Sakmann, B., and  
603 Oberlaender, M. (2022). The impact of neuron morphology on cortical network  
604 architecture. *Cell Reports* 39, 110677. 10.1016/j.celrep.2022.110677.
- 605 16. Shepherd, G.M.G., Stepanyants, A., Bureau, I., Chklovskii, D., and Svoboda, K. (2005).  
606 Geometric and functional organization of cortical circuits. *Nat Neurosci* 8, 782–790.  
607 10.1038/nn1447.
- 608 17. Sherman, S.M. (2014). The Function of Metabotropic Glutamate Receptors in Thalamus  
609 and Cortex. *Neuroscientist* 20, 136–149. 10.1177/1073858413478490.
- 610 18. Casas-Torremocha, D., Porrero, C., Rodriguez-Moreno, J., García-Amado, M., Lübke,  
611 J.H.R., Núñez, Á., and Clascá, F. (2019). Posterior thalamic nucleus axon terminals have  
612 different structure and functional impact in the motor and somatosensory vibrissal  
613 cortices. *Brain Struct Funct* 224, 1627–1645. 10.1007/s00429-019-01862-4.
- 614 19. Lee, C.C. (2010). Drivers and modulators in the central auditory pathways. *Front.*  
615 *Neurosci.* 10.3389/neuro.01.014.2010.
- 616 20. Bickford, M.E. (2016). Thalamic Circuit Diversity: Modulation of the Driver/Modulator  
617 Framework. *Front. Neural Circuits* 9. 10.3389/fncir.2015.00086.
- 618 21. Viaene, A.N., Petrof, I., and Sherman, S.M. (2011). Properties of the thalamic projection  
619 from the posterior medial nucleus to primary and secondary somatosensory cortices in  
620 the mouse. *Proc. Natl. Acad. Sci. U.S.A.* 108, 18156–18161. 10.1073/pnas.1114828108.
- 621 22. Miller-Hansen, A.J., and Sherman, S.M. (2022). Conserved patterns of functional  
622 organization between cortex and thalamus in mice. *Proc. Natl. Acad. Sci. U.S.A.* 119,  
623 e2201481119. 10.1073/pnas.2201481119.
- 624 23. Gambino, F., Pagès, S., Kehayas, V., Baptista, D., Tatti, R., Carleton, A., and Holtmaat, A.  
625 (2014). Sensory-evoked LTP driven by dendritic plateau potentials in vivo. *Nature* 515,  
626 116–119. 10.1038/nature13664.
- 627 24. Mease, R.A., Metz, M., and Groh, A. (2016). Cortical Sensory Responses Are Enhanced  
628 by the Higher-Order Thalamus. *Cell Reports* 14, 208–215.  
629 10.1016/j.celrep.2015.12.026.

- 630 25. Audette, N.J., Bernhard, S.M., Ray, A., Stewart, L.T., and Barth, A.L. (2019). Rapid  
631 Plasticity of Higher-Order Thalamocortical Inputs during Sensory Learning. *Neuron* 103,  
632 277-291.e4. 10.1016/j.neuron.2019.04.037.
- 633 26. Williams, L.E., and Holtmaat, A. (2019). Higher-Order Thalamocortical Inputs Gate  
634 Synaptic Long-Term Potentiation via Disinhibition. *Neuron* 101, 91-102.e4.  
635 10.1016/j.neuron.2018.10.049.
- 636 27. Zhang, W., and Bruno, R.M. (2019). High-order thalamic inputs to primary  
637 somatosensory cortex are stronger and longer lasting than cortical inputs. *eLife* 8,  
638 e44158. 10.7554/eLife.44158.
- 639 28. Castejon, C., Martin-Cortecero, J., and Nuñez, A. (2021). Higher-Order Thalamic  
640 Encoding of Somatosensory Patterns and Bilateral Events. *Front. Neural Circuits* 15,  
641 752804. 10.3389/fncir.2021.752804.
- 642 29. Wang, Y., Ye, M., Kuang, X., Li, Y., and Hu, S. (2018). A simplified morphological  
643 classification scheme for pyramidal cells in six layers of primary somatosensory cortex  
644 of juvenile rats. *IBRO Reports* 5, 74–90. 10.1016/j.ibror.2018.10.001.
- 645 30. Brecht, M., Roth, A., and Sakmann, B. (2003). Dynamic Receptive Fields of  
646 Reconstructed Pyramidal Cells in Layers 3 and 2 of Rat Somatosensory Barrel Cortex.  
647 *The Journal of Physiology* 553, 243–265. 10.1113/jphysiol.2003.044222.
- 648 31. Magee, J.C., and Cook, E.P. (2000). Somatic EPSP amplitude is independent of synapse  
649 location in hippocampal pyramidal neurons. *Nat Neurosci* 3, 895–903. 10.1038/78800.
- 650 32. Waters, J., Larkum, M., Sakmann, B., and Helmchen, F. (2003). Supralinear Ca<sup>2+</sup> Influx  
651 into Dendritic Tufts of Layer 2/3 Neocortical Pyramidal Neurons *In Vitro* and *In Vivo*. *J.*  
652 *Neurosci.* 23, 8558–8567. 10.1523/JNEUROSCI.23-24-08558.2003.
- 653 33. Larkum, M.E., Waters, J., Sakmann, B., and Helmchen, F. (2007). Dendritic Spikes in  
654 Apical Dendrites of Neocortical Layer 2/3 Pyramidal Neurons. *J. Neurosci.* 27, 8999–  
655 9008. 10.1523/JNEUROSCI.1717-07.2007.
- 656 34. Larkum, M.E., Nevian, T., Sandler, M., Polsky, A., and Schiller, J. (2009). Synaptic  
657 Integration in Tuft Dendrites of Layer 5 Pyramidal Neurons: A New Unifying Principle.  
658 *Science* 325, 756–760. 10.1126/science.1171958.
- 659 35. Zingg, B., Chou, X., Zhang, Z., Mesik, L., Liang, F., Tao, H.W., and Zhang, L.I. (2017). AAV-  
660 Mediated Anterograde Transsynaptic Tagging: Mapping Corticocollicular Input-Defined  
661 Neural Pathways for Defense Behaviors. *Neuron* 93, 33–47.  
662 10.1016/j.neuron.2016.11.045.
- 663 36. Schiller, J., Major, G., Koester, H.J., and Schiller, Y. (2000). NMDA spikes in basal  
664 dendrites of cortical pyramidal neurons. *Nature* 404, 285–289. 10.1038/35005094.

- 665 37. Larkum, M.E., Wu, J., Duverdin, S.A., and Gidon, A. (2022). The Guide to Dendritic  
666 Spikes of the Mammalian Cortex In Vitro and In Vivo. *Neuroscience* 489, 15–33.  
667 10.1016/j.neuroscience.2022.02.009.
- 668 38. Lavzin, M., Rapoport, S., Polsky, A., Garion, L., and Schiller, J. (2012). Nonlinear  
669 dendritic processing determines angular tuning of barrel cortex neurons in vivo. *Nature*  
670 490, 397–401. 10.1038/nature11451.
- 671 39. Palmer, L.M., Shai, A.S., Reeve, J.E., Anderson, H.L., Paulsen, O., and Larkum, M.E.  
672 (2014). NMDA spikes enhance action potential generation during sensory input. *Nat*  
673 *Neurosci* 17, 383–390. 10.1038/nn.3646.
- 674 40. Häusser, M., Spruston, N., and Stuart, G.J. (2000). Diversity and Dynamics of Dendritic  
675 Signaling. *Science* 290, 739–744. 10.1126/science.290.5492.739.
- 676 41. Branco, T., and Häusser, M. (2010). The single dendritic branch as a fundamental  
677 functional unit in the nervous system. *Current Opinion in Neurobiology* 20, 494–502.  
678 10.1016/j.conb.2010.07.009.
- 679 42. Major, G., Larkum, M.E., and Schiller, J. (2013). Active Properties of Neocortical  
680 Pyramidal Neuron Dendrites. *Annu. Rev. Neurosci.* 36, 1–24. 10.1146/annurev-neuro-  
681 062111-150343.
- 682 43. Brandalise, F., Carta, S., Helmchen, F., Lisman, J., and Gerber, U. (2016). Dendritic  
683 NMDA spikes are necessary for timing-dependent associative LTP in CA3 pyramidal  
684 cells. *Nat Commun* 7, 13480. 10.1038/ncomms13480.
- 685 44. Klapoetke, N.C., Murata, Y., Kim, S.S., Pulver, S.R., Birdsey-Benson, A., Cho, Y.K.,  
686 Morimoto, T.K., Chuong, A.S., Carpenter, E.J., Tian, Z., et al. (2014). Independent  
687 optical excitation of distinct neural populations. *Nat Methods* 11, 338–346.  
688 10.1038/nmeth.2836.
- 689 45. Lesage, F., and Lazdunski, M. (2000). Molecular and functional properties of two-pore-  
690 domain potassium channels. *American Journal of Physiology-Renal Physiology* 279,  
691 F793–F801. 10.1152/ajprenal.2000.279.5.F793.
- 692 46. Patel, A.J., and Honoré, E. (2001). Properties and modulation of mammalian 2P domain  
693 K<sup>+</sup> channels. *Trends in Neurosciences* 24, 339–346. 10.1016/S0166-2236(00)01810-5.
- 694 47. Chemin, J. (2003). Mechanisms underlying excitatory effects of group I metabotropic  
695 glutamate receptors via inhibition of 2P domain K<sup>+</sup> channels. *The EMBO Journal* 22,  
696 5403–5411. 10.1093/emboj/cdg528.
- 697 48. Mathie, A. (2007). Neuronal two-pore-domain potassium channels and their regulation  
698 by G protein-coupled receptors. *The Journal of Physiology* 578, 377–385.  
699 10.1113/jphysiol.2006.121582.

- 700 49. Hagenston, A.M., Fitzpatrick, J.S., and Yeckel, M.F. (2008). MGlur-Mediated Calcium  
701 Waves that Invade the Soma Regulate Firing in Layer V Medial Prefrontal Cortical  
702 Pyramidal Neurons. *Cerebral Cortex* 18, 407–423. 10.1093/cercor/bhm075.
- 703 50. Brandalise, F., Gerber, U., and Rossi, P. (2012). Golgi Cell-Mediated Activation of  
704 Postsynaptic GABAB Receptors Induces Disinhibition of the Golgi Cell-Granule Cell  
705 Synapse in Rat Cerebellum. *PLoS ONE* 7, e43417. 10.1371/journal.pone.0043417.
- 706 51. Shapiro, M.S., and Hille, B. (1993). Substance P and somatostatin inhibit calcium  
707 channels in rat sympathetic neurons via different G protein pathways. *Neuron* 10, 11–  
708 20. 10.1016/0896-6273(93)90237-L.
- 709 52. Oikonomou, K.D., Short, S.M., Rich, M.T., and Antic, S.D. (2012). Extrasynaptic  
710 Glutamate Receptor Activation as Cellular Bases for Dynamic Range Compression in  
711 Pyramidal Neurons. *Front. Physio.* 3. 10.3389/fphys.2012.00334.
- 712 53. Gao, P.P., Graham, J.W., Zhou, W.-L., Jang, J., Angulo, S., Dura-Bernal, S., Hines, M.,  
713 Lytton, W.W., and Antic, S.D. (2021). Local glutamate-mediated dendritic plateau  
714 potentials change the state of the cortical pyramidal neuron. *Journal of*  
715 *Neurophysiology* 125, 23–42. 10.1152/jn.00734.2019.
- 716 54. Dominiak, S.E., Nashaat, M.A., Sehara, K., Oraby, H., Larkum, M.E., and Sachdev, R.N.S.  
717 (2019). Whisking Asymmetry Signals Motor Preparation and the Behavioral State of  
718 Mice. *J. Neurosci.* 39, 9818–9830. 10.1523/JNEUROSCI.1809-19.2019.
- 719 55. Xu, N., Harnett, M.T., Williams, S.R., Huber, D., O'Connor, D.H., Svoboda, K., and  
720 Magee, J.C. (2012). Nonlinear dendritic integration of sensory and motor input during  
721 an active sensing task. *Nature* 492, 247–251. 10.1038/nature11601.
- 722 56. Kurnikova, A., Moore, J.D., Liao, S.-M., Deschênes, M., and Kleinfeld, D. (2017).  
723 Coordination of Orofacial Motor Actions into Exploratory Behavior by Rat. *Current*  
724 *Biology* 27, 688–696. 10.1016/j.cub.2017.01.013.
- 725 57. Mathis, A., Mamidanna, P., Cury, K.M., Abe, T., Murthy, V.N., Mathis, M.W., and  
726 Bethge, M. (2018). DeepLabCut: markerless pose estimation of user-defined body parts  
727 with deep learning. *Nat Neurosci* 21, 1281–1289. 10.1038/s41593-018-0209-y.
- 728 58. Weiler, S., Guggiana Nilo, D., Bonhoeffer, T., Hübener, M., Rose, T., and Scheuss, V.  
729 (2022). Orientation and direction tuning align with dendritic morphology and spatial  
730 connectivity in mouse visual cortex. *Current Biology* 32, 1743-1753.e7.  
731 10.1016/j.cub.2022.02.048.
- 732 59. Yonk, A.J., and Margolis, D.J. (2019). Traces of Learning in Thalamocortical Circuits.  
733 *Neuron* 103, 175–176. 10.1016/j.neuron.2019.06.020.
- 734 60. Pagès, S., Chenouard, N., Chéreau, R., Kouskoff, V., Gambino, F., and Holtmaat, A.  
735 (2021). An increase in dendritic plateau potentials is associated with experience-  
736 dependent cortical map reorganization. *Proc. Natl. Acad. Sci. U.S.A.* 118, e2024920118.  
737 10.1073/pnas.2024920118.

- 738 61. Poirazi, P., and Mel, B.W. (2001). Impact of Active Dendrites and Structural Plasticity on  
739 the Memory Capacity of Neural Tissue. *Neuron* 29, 779–796. 10.1016/S0896-  
740 6273(01)00252-5.
- 741 62. Larkum, M.E., and Nevian, T. (2008). Synaptic clustering by dendritic signalling  
742 mechanisms. *Current Opinion in Neurobiology* 18, 321–331.  
743 10.1016/j.conb.2008.08.013.
- 744 63. Iacaruso, M.F., Gasler, I.T., and Hofer, S.B. (2017). Synaptic organization of visual space  
745 in primary visual cortex. *Nature* 547, 449–452. 10.1038/nature23019.
- 746 64. Kumar, A., Schiff, O., Barkai, E., Mel, B.W., Poleg-Polsky, A., and Schiller, J. (2018).  
747 NMDA spikes mediate amplification of inputs in the rat piriform cortex. *eLife* 7,  
748 e38446. 10.7554/eLife.38446.
- 749 65. Kerlin, A., Mohar, B., Flickinger, D., MacLennan, B.J., Dean, M.B., Davis, C., Spruston,  
750 N., and Svoboda, K. (2019). Functional clustering of dendritic activity during decision-  
751 making. *eLife* 8, e46966. 10.7554/eLife.46966.
- 752 66. Staiger, J.F., and Petersen, C.C.H. (2021). Neuronal Circuits in Barrel Cortex for Whisker  
753 Sensory Perception. *Physiological Reviews* 101, 353–415.  
754 10.1152/physrev.00019.2019.
- 755 67. Nevian, T., and Sakmann, B. (2004). Single Spine Ca<sup>2+</sup> Signals Evoked by Coincident  
756 EPSPs and Backpropagating Action Potentials in Spiny Stellate Cells of Layer 4 in the  
757 Juvenile Rat Somatosensory Barrel Cortex. *J. Neurosci.* 24, 1689–1699.  
758 10.1523/JNEUROSCI.3332-03.2004.
- 759 68. Kampa, B.M., and Stuart, G.J. (2006). Calcium Spikes in Basal Dendrites of Layer 5  
760 Pyramidal Neurons during Action Potential Bursts. *J. Neurosci.* 26, 7424–7432.  
761 10.1523/JNEUROSCI.3062-05.2006.
- 762 69. Doron, M., Chindemi, G., Muller, E., Markram, H., and Segev, I. (2017). Timed Synaptic  
763 Inhibition Shapes NMDA Spikes, Influencing Local Dendritic Processing and Global I/O  
764 Properties of Cortical Neurons. *Cell Reports* 21, 1550–1561.  
765 10.1016/j.celrep.2017.10.035.
- 766 70. Yang, G.R., Murray, J.D., and Wang, X.-J. (2016). A dendritic disinhibitory circuit  
767 mechanism for pathway-specific gating. *Nat Commun* 7, 12815.  
768 10.1038/ncomms12815.
- 769 71. Karimi, A., Odenthal, J., Drawitsch, F., Boergens, K.M., and Helmstaedter, M. (2020).  
770 Cell-type specific innervation of cortical pyramidal cells at their apical dendrites. *eLife*  
771 9, e46876. 10.7554/eLife.46876.
- 772 72. Branco, T., Clark, B.A., and Häusser, M. (2010). Dendritic Discrimination of Temporal  
773 Input Sequences in Cortical Neurons. *Science* 329, 1671–1675.  
774 10.1126/science.1189664.



- 775 73. Wilson, D.E., Whitney, D.E., Scholl, B., and Fitzpatrick, D. (2016). Orientation selectivity  
776 and the functional clustering of synaptic inputs in primary visual cortex. *Nat Neurosci*  
777 *19*, 1003–1009. 10.1038/nn.4323.
- 778 74. Cichon, J., and Gan, W.-B. (2015). Branch-specific dendritic Ca<sup>2+</sup> spikes cause  
779 persistent synaptic plasticity. *Nature* *520*, 180–185. 10.1038/nature14251.
- 780 75. Milojkovic, B.A., Zhou, W., and Antic, S.D. (2007). Voltage and calcium transients in  
781 basal dendrites of the rat prefrontal cortex. *The Journal of Physiology* *585*, 447–468.  
782 10.1113/jphysiol.2007.142315.
- 783 76. Charpak, S., Gähwiler, B.H., Do, K.Q., and Knöpfel, T. (1990). Potassium conductances  
784 in hippocampal neurons blocked by excitatory amino-acid transmitters. *Nature* *347*,  
785 765–767. 10.1038/347765a0.
- 786 77. Gerber, U., Sim, J.A., and Gähwiler, B.H. (1992). Reduction of Potassium Conductances  
787 Mediated by Metabotropic Glutamate Receptors in Rat CA3 Pyramidal Cells Does Not  
788 Require Protein Kinase C or Protein Kinase A. *Eur J of Neuroscience* *4*, 792–797.  
789 10.1111/j.1460-9568.1992.tb00189.x.
- 790 78. Gerber, U., Gee, C., and Benquet, P. (2007). Metabotropic glutamate receptors:  
791 intracellular signaling pathways. *Current Opinion in Pharmacology* *7*, 56–61.  
792 10.1016/j.coph.2006.08.008.
- 793 79. Guérineau, N.C., Gähwiler, B.H., and Gerber, U. (1994). Reduction of resting K<sup>+</sup> current  
794 by metabotropic glutamate and muscarinic receptors in rat CA3 cells: mediation by G-  
795 proteins. *The Journal of Physiology* *474*, 27–33. 10.1113/jphysiol.1994.sp019999.
- 796 80. Anwyl, R. (1999). Metabotropic glutamate receptors: electrophysiological properties  
797 and role in plasticity. *Brain Research Reviews* *29*, 83–120. 10.1016/S0165-  
798 0173(98)00050-2.
- 799 81. Chuang, S.-C., Bianchi, R., and Wong, R.K.S. (2000). Group I mGluR Activation Turns on  
800 a Voltage-Gated Inward Current in Hippocampal Pyramidal Cells. *Journal of*  
801 *Neurophysiology* *83*, 2844–2853. 10.1152/jn.2000.83.5.2844.
- 802 82. Gee, C.E., Benquet, P., and Gerber, U. (2003). Group I metabotropic glutamate  
803 receptors activate a calcium-sensitive transient receptor potential-like conductance in  
804 rat hippocampus. *The Journal of Physiology* *546*, 655–664.  
805 10.1113/jphysiol.2002.032961.
- 806 83. Chen, X., Talley, E.M., Patel, N., Gomis, A., McIntire, W.E., Dong, B., Viana, F., Garrison,  
807 J.C., and Bayliss, D.A. (2006). Inhibition of a background potassium channel by Gq  
808 protein  $\alpha$ -subunits. *Proc. Natl. Acad. Sci. U.S.A.* *103*, 3422–3427.  
809 10.1073/pnas.0507710103.
- 810 84. Tateyama, M., and Kubo, Y. (2023). Regulation of the two-pore domain potassium  
811 channel, THIK-1 and THIK-2, by G protein coupled receptors. *PLoS ONE* *18*, e0284962.  
812 10.1371/journal.pone.0284962.

- 813 85. Fernández-Fernández, D., and Lamas, J.A. (2021). Metabotropic Modulation of  
814 Potassium Channels During Synaptic Plasticity. *Neuroscience* 456, 4–16.  
815 10.1016/j.neuroscience.2020.02.025.
- 816 86. Cohen, A., Ben-Abu, Y., and Zilberberg, N. (2009). Gating the pore of potassium leak  
817 channels. *Eur Biophys J* 39, 61–73. 10.1007/s00249-009-0457-6.
- 818 87. Mathie, A., A. Rees, K., F. El Hachmane, M., and L. Veale, E. (2010). Trafficking of  
819 Neuronal Two Pore Domain Potassium Channels. *CN* 8, 276–286.  
820 10.2174/157015910792246146.
- 821 88. Scheefhals, N., and MacGillavry, H.D. (2018). Functional organization of postsynaptic  
822 glutamate receptors. *Molecular and Cellular Neuroscience* 91, 82–94.  
823 10.1016/j.mcn.2018.05.002.
- 824 89. Talley, E.M., Sirois, J.E., Lei, Q., and Bayliss, D.A. (2003). Two-Pore-Domain (Kcnk)  
825 Potassium Channels: Dynamic Roles in Neuronal Function. *Neuroscientist* 9, 46–56.  
826 10.1177/1073858402239590.
- 827 90. Poulet, J.F.A., Fernandez, L.M.J., Crochet, S., and Petersen, C.C.H. (2012). Thalamic  
828 control of cortical states. *Nat Neurosci* 15, 370–372. 10.1038/nn.3035.
- 829 91. Stuyt, G., Godenzini, L., and Palmer, L.M. (2022). Local and Global Dynamics of  
830 Dendritic Activity in the Pyramidal Neuron. *Neuroscience* 489, 176–184.  
831 10.1016/j.neuroscience.2021.07.008.
- 832 92. Golding, N.L., Jung, H., Mickus, T., and Spruston, N. (1999). Dendritic Calcium Spike  
833 Initiation and Repolarization Are Controlled by Distinct Potassium Channel Subtypes in  
834 CA1 Pyramidal Neurons. *J. Neurosci.* 19, 8789–8798. 10.1523/JNEUROSCI.19-20-  
835 08789.1999.
- 836 93. Cai, X., Liang, C.W., Muralidharan, S., Kao, J.P.Y., Tang, C.-M., and Thompson, S.M.  
837 (2004). Unique Roles of SK and Kv4.2 Potassium Channels in Dendritic Integration.  
838 *Neuron* 44, 741. 10.1016/j.neuron.2004.11.004.
- 839 94. Harnett, M.T., Xu, N.-L., Magee, J.C., and Williams, S.R. (2013). Potassium Channels  
840 Control the Interaction between Active Dendritic Integration Compartments in Layer 5  
841 Cortical Pyramidal Neurons. *Neuron* 79, 516–529. 10.1016/j.neuron.2013.06.005.
- 842 95. Yang, S., Tang, C.-M., and Yang, S. (2015). The Shaping of Two Distinct Dendritic Spikes  
843 by A-Type Voltage-Gated K<sup>+</sup> Channels. *Front. Cell. Neurosci.* 9.  
844 10.3389/fncel.2015.00469.
- 845 96. Kim, J., Jung, S.-C., Clemens, A.M., Petralia, R.S., and Hoffman, D.A. (2007). Regulation  
846 of Dendritic Excitability by Activity-Dependent Trafficking of the A-Type K<sup>+</sup> Channel  
847 Subunit Kv4.2 in Hippocampal Neurons. *Neuron* 54, 933–947.  
848 10.1016/j.neuron.2007.05.026.

- 849 97. Aru, J., Suzuki, M., and Larkum, M.E. (2020). Cellular Mechanisms of Conscious  
850 Processing. *Trends in Cognitive Sciences* 24, 814–825. 10.1016/j.tics.2020.07.006.
- 851 98. Suzuki, M., and Larkum, M.E. (2020). General Anesthesia Decouples Cortical Pyramidal  
852 Neurons. *Cell* 180, 666-676.e13. 10.1016/j.cell.2020.01.024.
- 853 99. Zhang, Z., and Seguela, P. (2010). Metabotropic Induction of Persistent Activity in  
854 Layers II/III of Anterior Cingulate Cortex. *Cerebral Cortex* 20, 2948–2957.  
855 10.1093/cercor/bhq043.
- 856 100. Gada, K., and Plant, L.D. (2019). Two-pore domain potassium channels: emerging  
857 targets for novel analgesic drugs: IUPHAR Review 26. *British J Pharmacology* 176, 256–  
858 266. 10.1111/bph.14518.
- 859 101. Mathie, A., Veale, E.L., Cunningham, K.P., Holden, R.G., and Wright, P.D. (2021). Two-  
860 Pore Domain Potassium Channels as Drug Targets: Anesthesia and Beyond. *Annu. Rev.*  
861 *Pharmacol. Toxicol.* 61, 401–420. 10.1146/annurev-pharmtox-030920-111536.
- 862 102. Schindelin, J., Arganda-Carreras, I., Frise, E., Kaynig, V., Longair, M., Pietzsch, T.,  
863 Preibisch, S., Rueden, C., Saalfeld, S., Schmid, B., et al. (2012). Fiji: an open-source  
864 platform for biological-image analysis. *Nat Methods* 9, 676–682. 10.1038/nmeth.2019.
- 865 103. Pologruto, T.A., Sabatini, B.L., and Svoboda, K. (2003). ScanImage: Flexible software for  
866 operating laser scanning microscopes. *BioMed Eng OnLine* 2, 13. 10.1186/1475-925X-  
867 2-13.
- 868 104. Nath, T., Mathis, A., Chen, A.C., Patel, A., Bethge, M., and Mathis, M.W. (2019). Using  
869 DeepLabCut for 3D markerless pose estimation across species and behaviors. *Nat*  
870 *Protoc* 14, 2152–2176. 10.1038/s41596-019-0176-0.
- 871 105. Brandalise, F., Kalmbach, B.E., Mehta, P., Thornton, O., Johnston, D., Zemelman, B.V.,  
872 and Brager, D.H. (2020). Fragile X Mental Retardation Protein Bidirectionally Controls  
873 Dendritic  $I_h$  in a Cell Type-Specific Manner between Mouse Hippocampus and  
874 Prefrontal Cortex. *J. Neurosci.* 40, 5327–5340. 10.1523/JNEUROSCI.1670-19.2020.
- 875 106. Brandalise, F., Kalmbach, B.E., Cook, E.P., and Brager, D.H. (2023). Impaired dendritic  
876 spike generation in the Fragile X prefrontal cortex is due to loss of dendritic sodium  
877 channels. *The Journal of Physiology* 601, 831–845. 10.1113/JP283311.
- 878 107. Soldado-Magraner, S., Brandalise, F., Honnuraiah, S., Pfeiffer, M., Moulinier, M.,  
879 Gerber, U., and Douglas, R. (2020). Conditioning by subthreshold synaptic input  
880 changes the intrinsic firing pattern of CA3 hippocampal neurons. *Journal of*  
881 *Neurophysiology* 123, 90–106. 10.1152/jn.00506.2019.
- 882 108. Georgiou, C., Kehayas, V., Lee, K.S., Brandalise, F., Sahlender, D.A., Blanc, J., Knott, G.,  
883 and Holtmaat, A. (2022). A subpopulation of cortical VIP-expressing interneurons with  
884 highly dynamic spines. *Commun Biol* 5, 352. 10.1038/s42003-022-03278-z.

- 885 109. Roome, C.J., and Kuhn, B. (2014). Chronic cranial window with access port for repeated  
886 cellular manipulations, drug application, and electrophysiology. *Front. Cell. Neurosci.* *8*.  
887 10.3389/fncel.2014.00379.
- 888 110. Holtmaat, A., Bonhoeffer, T., Chow, D.K., Chuckowree, J., De Paola, V., Hofer, S.B.,  
889 Hübener, M., Keck, T., Knott, G., Lee, W.-C.A., et al. (2009). Long-term, high-resolution  
890 imaging in the mouse neocortex through a chronic cranial window. *Nat Protoc* *4*, 1128–  
891 1144. 10.1038/nprot.2009.89.
- 892 111. Jin, X.-T., Beaver, C.J., Ji, Q., and Daw, N.W. (2001). Effect of the Group I Metabotropic  
893 Glutamate Agonist DHPG on the Visual Cortex. *Journal of Neurophysiology* *86*, 1622–  
894 1631. 10.1152/jn.2001.86.4.1622.
- 895 112. Rahman, M.M., Kedia, S., Fernandes, G., and Chattarji, S. (2017). Activation of the same  
896 mGluR5 receptors in the amygdala causes divergent effects on specific versus  
897 indiscriminate fear. *eLife* *6*, e25665. 10.7554/eLife.25665.
- 898 113. Navarrete, M., Perea, G., De Sevilla, D.F., Gómez-Gonzalo, M., Núñez, A., Martín, E.D.,  
899 and Araque, A. (2012). Astrocytes Mediate In Vivo Cholinergic-Induced Synaptic  
900 Plasticity. *PLoS Biol* *10*, e1001259. 10.1371/journal.pbio.1001259.
- 901 114. Pnevmatikakis, E.A., and Giovannucci, A. (2017). NoRMCorre: An online algorithm for  
902 piecewise rigid motion correction of calcium imaging data. *Journal of Neuroscience*  
903 *Methods* *291*, 83–94. 10.1016/j.jneumeth.2017.07.031.
- 904 115. Chéreau, R., Bawa, T., Fodoulian, L., Carleton, A., Pagès, S., and Holtmaat, A. (2020).  
905 Dynamic perceptual feature selectivity in primary somatosensory cortex upon reversal  
906 learning. *Nat Commun* *11*, 3245. 10.1038/s41467-020-17005-x.
- 907 116. Vogelstein, J.T., Packer, A.M., Machado, T.A., Sippy, T., Babadi, B., Yuste, R., and  
908 Paninski, L. (2010). Fast Nonnegative Deconvolution for Spike Train Inference From  
909 Population Calcium Imaging. *Journal of Neurophysiology* *104*, 3691–3704.  
910 10.1152/jn.01073.2009.
- 911 117. Lock, J.T., Parker, I., and Smith, I.F. (2015). A comparison of fluorescent Ca<sup>2+</sup> indicators  
912 for imaging local Ca<sup>2+</sup> signals in cultured cells. *Cell Calcium* *58*, 638–648.  
913 10.1016/j.ceca.2015.10.003.

914  
915  
916  
917  
918

919 **STAR METHODS**

920

921 **KEY RESOURCES TABLE**

922

| REAGENT or RESOURCE                            | SOURCE                                                                                                                                                                                     | IDENTIFIER                                    |
|------------------------------------------------|--------------------------------------------------------------------------------------------------------------------------------------------------------------------------------------------|-----------------------------------------------|
| Viral vectors                                  |                                                                                                                                                                                            |                                               |
| AAV2/5-EF1a.eGFP.WPRE.RBG                      | University of Pennsylvania Vector Core                                                                                                                                                     | Cat # 105547-AAV5<br>RRID: Addgene_105547     |
| AAV2-CB7.Cl.mCherry.WPRE.RGB                   | University of Pennsylvania Vector Core                                                                                                                                                     | Cat # 105544-AAV2<br>RRID: Addgene_105544     |
| AAVrg-pmSyn1.EBFP-Cre                          | AAV pmSyn1-EBFP-Cre was a gift from Hongkui Zeng ( <a href="http://n2t.net/addgene:51507">http://n2t.net/addgene:51507</a> )                                                               | Addgene(51507-AAVrg),<br>RRID: Addgene_51507  |
| pAAVrg-CAG-tdTomato                            | pAAV-CAG-tdTomato (codon diversified) was a gift from Edward Boyden ( <a href="http://n2t.net/addgene:59462">http://n2t.net/addgene:59462</a> )                                            | Addgene(59462-AAVrg),<br>RRID: Addgene_59462  |
| AAV1-Flex-hSyn1-mRuby2-GSG-P2A-GCaMP6s-WPRE-pA | pAAV-hSyn1-Flex-mRuby2-GSG-P2A-GCaMP6s-WPRE-pA was a gift from Tobias Bonhoeffer & Mark Huebener & Tobias Rose ( <a href="http://n2t.net/addgene:68720">http://n2t.net/addgene:68720</a> ) | Addgene(68720-AAV1),<br>RRID: Addgene_68720   |
| AAV9-CaMKII-0.4.Cre-SV40                       | pENN.AAV.CamKII 0.4.Cre.SV40 was a gift from James M. Wilson ( <a href="http://n2t.net/addgene:105558">http://n2t.net/addgene:105558</a> )                                                 | Addgene(105558-AAV9),<br>RRID: Addgene_105558 |
| AAV1-mCaMKII $\alpha$ -iCre-WPRE-hGHp(A)       | UZH Viral Vector Facility                                                                                                                                                                  | v206-1                                        |
| AAV2-hSyn-DIO-eGFP                             | pAAV-hSyn-DIO-EGFP was a gift from Bryan Roth ( <a href="http://n2t.net/addgene:50457">http://n2t.net/addgene:50457</a> )                                                                  | Addgene(50457-AAV2),<br>RRID: Addgene_50457   |
| AAV2-CaMKII $\alpha$ -hChR2(H134R)-eYFP        | pAAV-CaMKII $\alpha$ -hChR2(H134R)-EYFP was a gift from Karl Deisseroth ( <a href="http://n2t.net/addgene:26969">http://n2t.net/addgene:26969</a> )                                        | Addgene(26969-AAV2),<br>RRID: Addgene_26969   |
| AAV2-EF1a-DIO-hChR2(E123T/T159C)-eYFP          | pAAV-Ef1a-DIO hChR2(E123T/T159C)-EYFP was a gift from Karl Deisseroth ( <a href="http://n2t.net/addgene:35509">http://n2t.net/addgene:35509</a> )                                          | Addgene(35509-AAV2),<br>RRID: Addgene_35509   |
| Chemicals, peptides, and recombinant proteins  |                                                                                                                                                                                            |                                               |
| (RS)-3,5-DHPG                                  | Tocris Bioscience                                                                                                                                                                          | Cat. No. 0342                                 |
| (RS)-MCPG                                      | Tocris Bioscience                                                                                                                                                                          | Cat. No. 0336                                 |
| APV                                            | Sigma Aldrich                                                                                                                                                                              | A8054                                         |
| Bupivacaine hydrochloride                      | Sigma Aldrich                                                                                                                                                                              | PHR1128                                       |
| QX 314 chloride                                | Tocris Bioscience                                                                                                                                                                          | Cat. No. 2313                                 |
| Barium chloride dihydrate                      | Sigma Aldrich                                                                                                                                                                              | 217565                                        |
| A1899                                          | Tocris Bioscience                                                                                                                                                                          | Cat. No. 6972                                 |
| Fluoxetine hydrochloride                       | Tocris Bioscience                                                                                                                                                                          | Cat. No. 0927                                 |
| IBMX                                           | Tocris Bioscience                                                                                                                                                                          | Cat. No. 2845                                 |
| LY367385                                       | Tocris Bioscience                                                                                                                                                                          | Cat. No. 1237                                 |
| TETRODOTOXIN Citrate (TTX)                     | Latoxan                                                                                                                                                                                    | L8502                                         |
| 4-Aminopyridine (4AP)                          | Sigma Aldrich                                                                                                                                                                              | A78403                                        |
| NBQX disodium salt (NBQX)                      | Abcam                                                                                                                                                                                      | ab120046                                      |
| (+)-Bicuculline                                | Tocris Bioscience                                                                                                                                                                          | Cat. No. 0130                                 |
| DL-TBOA                                        | Tocris Bioscience                                                                                                                                                                          | Cat. No. 1223                                 |

| Deposited data                         |                                                     |                                                                                                                          |
|----------------------------------------|-----------------------------------------------------|--------------------------------------------------------------------------------------------------------------------------|
| Raw and analyzed data                  | This study                                          | <a href="https://doi.org/10.5281/zenodo.10210325">https:// doi.org/ 10.5281/zenodo.10210325</a>                          |
| Experimental models: Organisms/strains |                                                     |                                                                                                                          |
| Mouse/C57BL/6JRj                       | Janvier Labs                                        | <a href="https://janvier-labs.com/fiche_produit/2-c57bl-6jrj/">https://janvier-labs.com/fiche_produit/2-c57bl-6jrj/</a>  |
| Mouse/ Pvalbtm1(cre)Arbr/J (PVcre)     | The Jackson Laboratory                              | MGI:3590684<br><a href="https://www.jax.org/strain/008069">https://www.jax.org/strain/008069</a> , RRID: IMSR_JAX:008069 |
| Software and algorithms                |                                                     |                                                                                                                          |
| Fiji                                   | Schindelin et al. <sup>102</sup>                    | <a href="https://imagej.net/Fiji">https://imagej.net/Fiji</a>                                                            |
| pClamp 10.5                            | Molecular Devices, LLC                              | <a href="https://www.moleculardevices.com/">https://www.moleculardevices.com/</a>                                        |
| Clampfit 10                            | Molecular Devices, LLC                              | <a href="https://www.moleculardevices.com/">https://www.moleculardevices.com/</a>                                        |
| Origin 2021                            | OriginLab Corporation                               | <a href="https://www.originlab.com/2021">https://www.originlab.com/2021</a>                                              |
| Prism                                  | GraphPad                                            | <a href="https://www.graphpad.com/">https://www.graphpad.com/</a>                                                        |
| NeuroLucida                            | MBF Bioscience                                      | <a href="https://www.mbfbioscience.com/products/neuroLucida/">https://www.mbfbioscience.com/products/neuroLucida/</a>    |
| Scanimage2016                          | Vidrio Technologies Pologruto et al. <sup>103</sup> | <a href="https://www.mbfbioscience.com/products/scanimage/">https://www.mbfbioscience.com/products/scanimage/</a>        |
| Matlab2018a and 2020b                  | The MathWorks, Inc                                  | <a href="https://www.mathworks.com/products/matlab.html">https://www.mathworks.com/products/matlab.html</a>              |
| Python                                 | Python Software Foundation                          | <a href="http://www.python.org/">http://www.python.org/</a>                                                              |
| DeepLabCut v2.2.0.2                    | Nath et al. <sup>104</sup>                          | <a href="https://github.com/DeepLabCut/DeepLabCut">https://github.com/DeepLabCut/DeepLabCut</a>                          |
| R v4.0.3                               | The R Foundation                                    | <a href="http://www.r-project.org/">http://www.r-project.org/</a>                                                        |

923

## 924 RESOURCE AVAILABILITY

### 925 Lead contact

926 Further information and requests for resources and reagents should be directed to and will  
927 be fulfilled by the lead contact, Anthony Holtmaat ([anthony.holtmaat@unige.ch](mailto:anthony.holtmaat@unige.ch)).

928

### 929 Materials availability

930 This study did not generate new unique reagents.

931

### 932 Data and code availability

- 933
- 934 • The data used to generate the figures is freely available at the CERN data repository  
935 Zenodo <https://zenodo.org/communities/holtmaat-lab-data/> with [https://doi.org/ 10.5281/zenodo.10210325](https://doi.org/10.5281/zenodo.10210325).

- 936       • The principal Matlab code that was used for data analysis is freely available at the  
937       CERN data repository Zenodo <https://zenodo.org/communities/holtmaat-lab-data/>  
938       with [https:// doi.org/ 10.5281/zenodo.10210325](https://doi.org/10.5281/zenodo.10210325).

939

## 940 **EXPERIMENTAL MODEL AND SUBJECT DETAILS**

### 941 **Mice**

942 Male C57BL/6J wild-type (Charles River or Janvier Labs) and PV-Cre mice  
943 (<https://www.jax.org/strain/017320>), aged 8 to 12 weeks, were group housed with  
944 littermates on a normal 12-h light cycle with food and water available *ad libitum*. All  
945 procedures were conducted in accordance with the guidelines of the Federal Food Safety and  
946 Veterinary Office of Switzerland and in agreement with the veterinary office of the Canton of  
947 Geneva (license numbers GE12219B, GE/74/18 and GE253A).

948

### 949 **METHOD DETAILS**

#### 950 **Virus injection for electrophysiology**

951 C57BL/6J or Parvalbumin (PV)-Cre mice, 8–12 weeks old, were anesthetized with isoflurane  
952 mixed with oxygen (3–5% induction, 1–2% maintenance), placed in a stereotaxic apparatus,  
953 and prepared for injections with craniotomies over the target injection regions. Deep  
954 anesthesia was assessed by absence of foot pinch reaction. The skin overlying the skull was  
955 removed under local anesthesia using Carbostesin (AstraZeneca) or Lidocaine (Streuli). Mice  
956 were then head-fixed with ear-bars and a nose clamp on a stereotaxic apparatus (Stoelting).  
957 Eyes were protected from drying with artificial tears. The body temperature was monitored  
958 with a rectal probe and was maintained at ~37°C using a heating pad (FHC) during surgery.  
959 Bilateral craniotomies were performed using an air-pressurized driller and injections (100-200  
960 nl per injection site) were performed using a pulled glass pipette (10–15 µm diameter tip)  
961 mounted on a Nanoject II small-volume injector (Drummond Scientific). Injections were  
962 performed at a speed of 23 nl/s, separated by 2-3 min intervals, in POm (2.2 mm posterior to  
963 bregma, 1.2 mm lateral and 3 mm below the bregma), VPM (1.85 mm posterior to bregma,  
964 1.75 mm lateral and 3.5 mm below the bregma), S1 (1.5 mm posterior to bregma, 3.5 mm  
965 lateral and 0.4 mm below the pial surface), M1 (1.54 mm anterior to bregma, 1.75 mm lateral  
966 and 0.5 mm below the pial surface) and S2 (0.7 mm posterior to bregma, 4.2 mm lateral and

967 0.3 mm below the pial surface). Different viruses (AAV2/5-EF1a.eGFP.WPRE.RBG; AAV2-  
968 CB7.Cl.mCherry.WPRE.RBG; AAVrg-pmSyn1.EBFP-Cre; pAAVrg-CAG-tdTomato; AAV2-  
969 rAAV.EF1a-DIO-hChR2(E123/T159C)-eYFP; AAV2-CaMKII $\alpha$ -hChR2-eYFP) were injected with  
970 regards to the different experiments. All injections were bilateral. The pipette was left in place  
971 for 3–5 min before removing it from the brain. Mice were given analgesics (carprofen 5  
972 mg/kg; TW Medical, #PF-8507) after surgery and monitored daily to ensure full recovery.  
973 Animals were then put back in their home cage to recover from the surgery. A minimum  
974 period of three weeks was allowed for viral expression before the animals underwent  
975 additional experimental procedures.

976

### 977 **Acute brain slice preparation**

978 Mice were anesthetized with a ketamine/xylazine (100 mg/kg, 10 mg/kg) cocktail and were  
979 perfused intracardially with ice-cold high sucrose saline solution consisting of the following  
980 (in mM): 2.8 KCl, 1.25 NaH<sub>2</sub>PO<sub>4</sub>, 25 NaHCO<sub>3</sub>, 0.5 CaCl<sub>2</sub>, 7 MgCl<sub>2</sub>, 7 dextrose, 205 sucrose, 1.3  
981 ascorbate, and 3 sodium pyruvate (bubbled with 95% O<sub>2</sub>/5% CO<sub>2</sub> to maintain pH at ~7.4). A  
982 vibrating tissue slicer (Leica VT S1000, Germany) was used to make 250- $\mu$ m-thick sections  
983 from 0.58 to 1.46 mm posterior to the bregma position. For obtaining S1 acute slice, the brain  
984 was removed and mounted to the stage of the vibratome, and sections were made coronally.  
985 Slices were held for 30 minutes at 35°C in a chamber filled with aCSF consisting of the  
986 following (in mM): 125 NaCl, 2.5 KCl, 1.25 NaH<sub>2</sub>PO<sub>4</sub>, 25 NaHCO<sub>3</sub>, 2 CaCl<sub>2</sub>, 2 MgCl<sub>2</sub>, 10 dextrose,  
987 and 3 sodium pyruvate (bubbled with 95%O<sub>2</sub>/5% CO<sub>2</sub>) and then at room temperature until  
988 the time of recording.

989

### 990 **Whole cell recording**

991 The intracellular solution contained the following (in mM): 120 K-gluconate, 16 KCl, 10 HEPES,  
992 8 NaCl, 7 Mg<sup>2+</sup>-phosphocreatine, 0.3 Na-GTP, 4 Mg-ATP, pH 7.3 with KOH<sup>105,106</sup>. Biocytin  
993 (Vector Laboratories; 0.1%-0.2%) was also included for histological processing and *post hoc*  
994 cell location determination. In some experiments, Alexa-594 (16  $\mu$ M; Thermo Fisher Scientific,  
995 #A10428) was also included in the internal recording solution to determine the dendritic  
996 recording location relative to the soma as well as a first assessment of the cell morphology.  
997 Dendritic recordings were performed at approximately 157  $\pm$  25  $\mu$ m from the soma for BT  
998 neurons and 208  $\pm$  43  $\mu$ m for ST neurons. Data was acquired using a Multiclamp 700b



999 amplifier and the Clampex11 (Molecular Devices) data acquisition software. Data were  
1000 acquired at 10–50 kHz, filtered at 2–10 kHz, and digitized by an Axon Digidata 1550B interface  
1001 (Molecular Devices). Pipette capacitance was automatically compensated for. Series  
1002 resistance was monitored and compensated throughout each experiment and was 10–25 M $\Omega$   
1003 for somatic recordings and 15–40 M $\Omega$  for dendritic recordings. Recordings were discarded if  
1004 series resistance increased by more than 30% during the recording. Voltages are not  
1005 corrected for the liquid-junction potential (estimated as  $\sim 8$  mV). The acute slice was placed  
1006 in a recorded chamber with a feedback temperature system set at 36 degrees and  
1007 continuously perfused with oxygenated ACSF (flow rate 1.5 ml/min). For optogenetic  
1008 stimulation, 5-ms long light pulses were delivered through the objective using the coolLED  
1009 pE-300ultra (CoolLED Ltd.), delivering blue light ( $475 \pm 23$  nm) for activating ChR2 and/or  
1010 amber light for activating ChrimsonR ( $575 \pm 25$  nm). The intensity of the LED was normally set  
1011 to 7 mW/mm<sup>2</sup> (10% of the maximum LED power) for the blue light and 6.3 mW/mm<sup>2</sup> (30% of  
1012 the maximum LED power) for the amber light unless stated otherwise in the text.

1013 Depending on the experiments, the following drugs were perfused in the bath, together or  
1014 sequentially as described in the main text and figure legends: APV (50  $\mu$ M, Sigma Aldrich),  
1015 bupivacaine (1 mM, Sigma Aldrich), QX-314 (1 mM, Tocris Bioscience), Barium (1 mM, Sigma  
1016 Aldrich), A1899 (100 nM, Tocris Bioscience), Fluoxetine hydrochloride (100  $\mu$ M, Tocris  
1017 Bioscience), IBMX (200  $\mu$ M, Tocris Bioscience), LY367385 (50  $\mu$ M, Tocris Bioscience), MCPG  
1018 (500  $\mu$ M, Tocris Bioscience), TTX (1  $\mu$ M; Latoxan), 4AP (100  $\mu$ M; Sigma Aldrich), NBQX (10  $\mu$ M,  
1019 Abcam), bicuculline (10  $\mu$ M, Tocris Bioscience), DHPG (10  $\mu$ M, Tocris Bioscience), TBOA (10  
1020  $\mu$ M, Tocris Bioscience). For some experiments, GDP- $\beta$ -S (1 mM, Sigma Aldrich) was mixed with  
1021 the intracellular solution.

1022

### 1023 **Analysis on electrophysiological recordings**

1024 The parameters of the optogenetically evoked events, such as the rise time, amplitude,  
1025 duration, were analyzed using built-in functions in Clampex (Molecular Devices).

1026 To assess if a neuron exhibited dSpikes with the co-stimulation of a pair of inputs, we analyzed  
1027 the distribution of the mean amplitude of the optogenetically evoked events and calculated  
1028 a bimodality coefficient from the distribution as follow:

$$1029 \quad BC = (S^2 + 1) / (K + 3 \times \frac{(N - 1)^2}{N - 2} / \frac{N - 2}{N - 3})$$

1030 where  $N$  is the number of samples,  $K$  and  $S$  are the data kurtosis and skewness respectively,  
1031 calculated using MATLAB functions (Mathworks). We considered that a distribution was  
1032 bimodal when  $BC$  was greater than 0.5. Subsequently, a  $k$ -means cluster analysis with  $k = 2$   
1033 was applied to determine which trials displayed dSpikes, and this served to calculate the  
1034 fraction of trials and the mean amplitude of dSpikes. In addition, dSpike strength was  
1035 calculated by multiplying the fraction of trials with dSpikes with their mean amplitude.  
1036 Post-stimulation events were automatically identified by detecting the changes in the  
1037 membrane potential using a threshold that corresponded to 3 times the standard deviation  
1038 of the baseline noise. This baseline noise was defined as the data below the median value of  
1039 the whole trace. Traces were then low pass filtered at 100 ms and events were detected as  
1040 above the threshold for at least 10 ms. The amplitude and duration of all the detected events  
1041 were then extracted. We used a conservative threshold of 200 ms to separate short and long-  
1042 lasting events; the latter being classified as plateau potentials confirmed by visual inspection.

1043

#### 1044 **Morphological identification and reconstruction of recorded neurons**

1045 When approaching with the patch pipette, L2/3 pyramidal neurons were discriminated by the  
1046 orientation of their main apical dendrite visualized in bright field mode. A cell with an oblique  
1047 apical dendrite would be selected as a putative BT neuron. On the contrary, a cell with a main  
1048 apical dendrite going straight toward the pia would be classified as a putative ST neuron.  
1049 Once the electrophysiological recording was completed, the electrode was gently pulled back  
1050 from the dendrite to avoid membrane ruptures to let the recorded neuron retrospectively  
1051 reconstructed using NeuroLucida to confirm their dendritic morphology (Figure 1A, Figure  
1052 S1A). More in detail, each slice was then transferred in paraformaldehyde (PFA) 4% in 0.1 M  
1053 phosphate buffer saline (PBS) for 10-15 min, then stored in 0.1 M PBS at 4 °C until the  
1054 beginning of the biocytin staining procedure (up to 1 week). As previously reported<sup>107</sup>, slices  
1055 were washed in PBS, then incubated in 1% Triton for 30 min and in 0.5% H<sub>2</sub>O<sub>2</sub> for 30 min.  
1056 Slices were washed again in PBS and incubated with VECTASTAIN Elite ABC Horseradish  
1057 Peroxidase kit (Vector Laboratories) for 48 hours at 4° C. Slices were washed again in PBS and  
1058 reacted with the chromogen 3,3'-diaminobenzidine (DAB kit, Vector Laboratories). When the  
1059 reaction was complete, slices were mounted with the Vectashield mounting medium (Vector  
1060 Laboratories). Dendritic arborizations were reconstructed in bright field under a 100/1.30 NA  
1061 oil-immersion objective using a NeuroLucida system (MicroBrightField). Only spiny neurons

1062 were included in the reconstructed pool. VIP spiny neurons<sup>108</sup> were discriminated based on  
1063 their distinct electrophysiological passive and firing properties. Quantification of the length  
1064 and number of branches was automatically extracted from the reconstructions. Basal and  
1065 apical dendrites were defined automatically as all the dendrites that originate from below or  
1066 above the centroid of the soma respectively (Figure S1).

1067

### 1068 **Surgery for in vivo calcium imaging**

1069 Stereotaxic injections of adeno-associated viral (AAV) vectors were carried out on 6 weeks  
1070 old male C57BL/6J mice (Janvier Labs). Anesthesia was first induced by a mix of O<sub>2</sub> and 4%  
1071 isoflurane at 0.4 L.min<sup>-1</sup> followed by an intraperitoneal injection of MMF solution, consisting  
1072 of 0.2 mg.kg<sup>-1</sup> medetomidine (Dormitor, Orion Pharma), 5 mg.kg<sup>-1</sup> midazolam (Dormicum,  
1073 Roche), and 0.05 mg.kg<sup>-1</sup> fentanyl (Fentanyl, Sinetica) diluted in sterile 0.9% NaCl. A mix of  
1074 AAV1-Flex-hSyn1-mRuby2-GSG-P2A-GCaMP6s-WPRE-pA and AAV9-CaMKII-0.4.Cre-SV40  
1075 (Addgene, 68720-AAV1 and 105558-AAV9 respectively) with a ratio of 20:1 was delivered to  
1076 L2/3 of the right S1 at the approximate location of the C2 barrel-related column (1.4 mm  
1077 posterior to the bregma, 3.5 mm to the right, -0.3 mm below the pial surface). A 3-mm  
1078 diameter cranial window, prepared with a silicone port<sup>109</sup>, was implanted, as described  
1079 previously<sup>110</sup>. Imaging was performed after at least 2 weeks of viral expression.

1080

### 1081 **In vivo drug injections**

1082 After recording the spontaneous activity of L2/3 neurons in baseline conditions, the mGluRI  
1083 agonist DHPG (50 mM<sup>111,112</sup>; Tocris Bioscience) or antagonist MCPG (500 μM<sup>113</sup>; Tocris  
1084 Bioscience) was injected through the silicone port of the cranial window using a glass pipette.  
1085 A volume of 100 nl was slowly injected right below the pia. Mice were left to recover for 15  
1086 min before placing them back under the microscope for recording.

1087

### 1088 **Two-photon laser scanning microscopy**

1089 We used a custom built 2-photon laser scanning microscope mounted onto a modular *in vivo*  
1090 multiphoton microscopy system (<https://www.janelia.org/open-science/mimms-10-2016>)  
1091 equipped with an 8-kHz resonant scanner and a 16× 0.8NA objective (Nikon, CFI75), and  
1092 controlled with Scanimage 2016b<sup>103</sup> (<http://www.scanimage.org>). Fluorophores were excited  
1093 using a Ti:Sapphire laser (Chameleon Ultra, Coherent) tuned to  $\lambda = 980$  nm at an approximate

1094 power of 25 mW. Fluorescent signals were collected with GaAsP photomultiplier tubes  
1095 (10770PB-40, Hamamatsu) separating mRuby2 and GCaMP6s signals with a dichroic mirror  
1096 (565dcxr, Chroma) and emission filters (ET620/60m and ET525/50m, respectively, Chroma).  
1097 Prior imaging, mice were handled and accustomed to being head restrained under the  
1098 microscope for 10-15 min over 4-5 days. Two imaging depths were acquired quasi-  
1099 simultaneously at approximately 10 Hz using a piezo z-scanner (P-725 PIFO, Physik  
1100 Instrumente) for moving the objective over the z-axis. The two planes were set with a size of  
1101  $350 \times 350 \mu\text{m}$  ( $512 \times 256$  pixels) and positioned at 100 and 300  $\mu\text{m}$  below the pia (i.e. the  
1102 upper and lower L2/3).

1103

#### 1104 **Image processing**

1105 Images were processed using custom-written MATLAB scripts and ImageJ  
1106 (<http://rsbweb.nih.gov/ij/>). Lateral motion corrections were performed using the reference  
1107 mRuby2 signal, from the red channel. Rigid lateral movement vectors were calculated using  
1108 the NoRMCorre MATLAB toolbox<sup>114</sup>. Residual bidirectional scanning artifact vectors were  
1109 calculated using a highest-pixel-line signal correlation between the two scanning directions  
1110 on the entire frame. All calculated lateral motion corrections were applied on both the  
1111 mRuby2 and GCaMP6s channels. For an unbiased extraction of the GCaMP6s fluorescence  
1112 signals from individual neurons, regions of interest (ROIs) were drawn manually for each  
1113 session based on neuronal shape using the mRuby2 signal. The fluorescence time-course of  
1114 each neuron and channels were measured as the average of all pixel values within the ROI.  
1115 Local neuropil signal was measured for each ROI and channels as the average of pixel values  
1116 within an automatically defined ring of 15  $\mu\text{m}$  width, 2  $\mu\text{m}$  away from the ROI and excluding  
1117 overlapping regions with surrounding ROIs. Residual axial movement corrections were  
1118 applied using the fluctuations in the mRuby2 signal of the measured ROIs. To perform this  
1119 correction, signal traces were initially filtered using an exponential moving average filter with  
1120 a window size of 500 ms. Then, the mRuby2 signal trace ( $FR_{cell\ measured}$ ) was rescaled to the  
1121 GCaMP6s ( $FG_{cell\ measured}$ ) signal trace by normalizing the values using their 8<sup>th</sup> percentiles  
1122 ( $minR$  and  $minG$  respectively) and their median values ( $medR$  and  $medG$  respectively) over  
1123 a rolling window of 180 s as:

$$\begin{aligned} 1124 \quad & FR_{cell\ rescaled}(t) \\ 1125 \quad & = ([FR_{cell\ measured}(t) - minR(t - 90:t + 90)]/medR(t - 90:t \\ 1126 \quad & + 90)) \times medG(t - 90:t + 90) + minG(t - 90:t + 90) \end{aligned}$$

1127 We used the median value for normalization to consistently compare the mRuby2 signal with  
1128 basal GCaMP6s signal. The GCaMP6s signal was then corrected as follow:

$$1129 \quad FG_{cell\ corrected}(t) = FG_{cell\ measured}(t)/FR_{cell\ rescaled}(t) \times medG(t - 90:t + 90)$$

1130 The same operations were performed on the neuropil signal to obtain the neuropil corrected  
1131 vector ( $FG_{neuropil\ corrected}$ ). The true GCaMP6s signal of a cell body was then estimated as:

$$1132 \quad F(t) = FG_{cell\ corrected}(t) - r \times FG_{neuropil\ corrected}(t), \text{ with } r = 0.7^{115}.$$

1133 Normalized calcium traces  $\Delta F/F_0$  were calculated as:  $(F(t) - F_0)/F_0$ , where  $F_0$  is the 30<sup>th</sup>  
1134 percentile of the whole  $F$  trace. To determine if a neuron had changed its level of activity  
1135 after drug injection, we calculated the effect size (or Cohen's d). The effect size corresponded  
1136 to the difference in means between the before and after normalized calcium traces divided  
1137 by the pooled standard deviation. To calculate the Cohen's d, we used a permutation test by  
1138 shuffling 1,000 times the datapoints between the two traces to create a null distribution of  
1139 differences in means and standard deviations that would be expected under the null  
1140 hypothesis of no difference between the two traces. We considered that a neuron changed  
1141 its level of activity if the Cohen's d was more than 0.2, which corresponds to a small effect  
1142 size.

1143

#### 1144 **Anterograde labeling and analysis**

1145 AAV injections were performed following a similar procedure as for surgeries for *in vivo*  
1146 imaging but without cranial window implantation. For these experiments, 20 nl of AAV1-  
1147 mCaMKII $\alpha$ -iCre-WPRE-hGHp(A) was injected in either the VPM (1.8 mm posterior to bregma,  
1148 1.7 mm lateral and 3.5 mm below the bregma) or in the POM (2.2 mm posterior to bregma,  
1149 1.25 mm lateral and 3 mm below the bregma). A second injection of 200 nl of AAV2-hSyn-  
1150 DIO-eGFP at the approximate C2 barrel coordinates (1.4 mm posterior to bregma, 3.5 mm to  
1151 the right and 0.3 mm below the pial surface). After 3-5 weeks of viral expression, mice were  
1152 perfused, and brain slices were cut at a thickness of 300  $\mu$ m. Images stacks of 650  $\times$  650  $\times$   
1153  $\sim$ 300  $\mu$ m, with a voxel size of 0.3  $\times$  0.3  $\times$  1.5  $\mu$ m, were acquired using 2-photon laser scanning  
1154 microscopy (see above) tuned to 910 nm and a 25 $\times$  1.1NA objective (Nikon) at an approximate

1155 power of 50 mW. The positions of the soma were manually marked, and the pia position was  
1156 automatically defined using a custom-written script in MATLAB.

1157

### 1158 **Decoding analysis**

1159 Snout movement recording was performed under 930 nm infrared illumination (M940L3,  
1160 Thorlabs) using a 20 Hz infrared sensitive camera and the FlyCap acquisition software (FLIR  
1161 Systems). Snout position was extracted from the raw video frames using the DeepLabCut  
1162 tracking algorithm<sup>57</sup>. In brief, a model was created using hand-annotated sample frames of  
1163 the position of the snout in different imaging sessions. The model was then applied to  
1164 determine the position of the snout in each frame of all the videos. The movement was  
1165 calculated as the sum of the absolute derivatives of the x and y positions coordinates and  
1166 applied a low-pass filter at 1 Hz.

1167 A random forests machine-learning algorithm was used to decode the snout movements from  
1168 the activity of single neurons. Given the slow kinetics of calcium transients captured by the  
1169 GCaMP6s sensor, spiking rates were inferred from the  $\Delta F/F_0$  trace and used as input to the  
1170 algorithm, which allowed to temporally match fast motor movements to neuronal activity.  
1171 For this we used a fast nonnegative deconvolution method  
1172 (<https://github.com/jovo/oopsi>)<sup>116</sup> with variable background fluorescence estimation and a  
1173  $K_D$  of 144 nM<sup>117</sup>. For the algorithm to capture differences in activity levels between neurons,  
1174 the activity traces from the movies before and after drug injections and of all neurons  
1175 recorded were concatenated before inferring spikes. Both neuronal activity and behavior  
1176 traces were resampled at 20 Hz. To account for putatively preceding pre-motor and/or  
1177 following sensory-related activity in S1 relative to behavioral events, the neuronal activity  
1178 traces were shifted negatively and positively in time with a maximum shift of 250 ms. Thus,  
1179 eleven time-shifted inferred firing rate traces (discretized in time bins of 50 ms) centered on  
1180 zero time shift were used to predict instantaneous behavioral features and composed a  
1181 vector  $X_i(t) = [x_i(t - 250 \text{ ms}), \dots, x_i(t), \dots, x_i(t + 250 \text{ ms})]$  where  $x_i(t)$  represents the  
1182 inferred firing rates of the  $i^{th}$  neuron at zero time shift. The ranger function of the ranger R  
1183 package version 0.10.1 was used to construct regression forests, with the snout movement  
1184 as the dependent variable and the binned inferred firing rates of a given neuron as predictors.  
1185 Most arguments of the function were kept at default settings, except the following: the  
1186 number of trees was set to 128, the minimum size of terminal nodes was set to 2, the number

1187 of predictor variables randomly sampled at each node split was set to the maximum between  
1188 1 or the third of the number of predictors, and the variable importance mode was set to  
1189 “impurity”. To obtain a prediction for all trials, 5-fold cross-validation was applied by training  
1190 the algorithm on 80% of the data (i.e. training set) and evaluating it on the remaining 20% of  
1191 the data (i.e. test set). For each neuron, the decoding accuracy was assessed by computing  
1192 the Pearson’s product-moment correlation coefficient between the observed and predicted  
1193 behavioral event fluctuations.

1194

### 1195 **Statistical Analysis**

1196 All data are expressed as the mean  $\pm$  s.e.m. unless stated otherwise. No data sets were  
1197 excluded from analysis. For data obtained from electrophysiological recordings, before  
1198 applying the Student *t*-test, a QQ plot was generated and the Shapiro-Wilk test was  
1199 performed for each pool of data to confirm a normal distribution. Repeated-measures  
1200 ANOVA, between-subjects factors ANOVA, mixed-factors ANOVA, and *post-hoc t*-tests were  
1201 used to test for statistical differences between experimental conditions. Sidak's correction  
1202 was used to correct for multiple comparisons. Statistical analyses were performed using Prism  
1203 (GraphPad), Origin 2021 (OriginLab) or MATLAB and considered significant if  $P < 0.05$ . Power  
1204 analyses were performed using G\*power and reported as Type II error probability ( $\beta$ ).

1205

1206

1207

## FIGURES

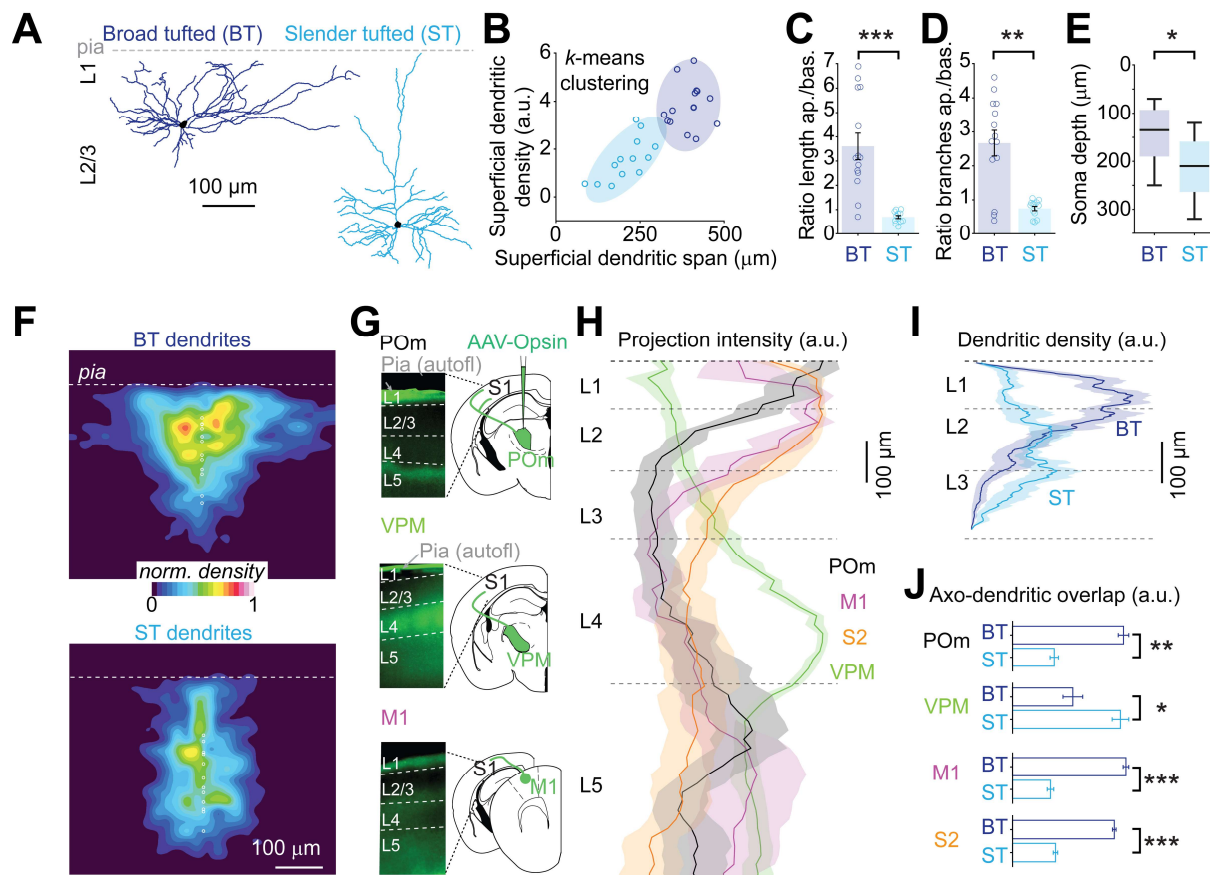

1208

1209

### Figure 1. BT and ST neurons in S1 form distinct groups based on morphological features

1210

(A) Examples of morphological reconstruction from biocytin-filled L2/3 pyramidal neurons in S1 indicating at least two distinct groups of L2/3 pyramidal neurons as previously described<sup>8,9</sup>: BT neurons exhibiting a large and dense apical arborization and ST neurons displaying a reduced apical arborization.

1214

(B) 27 neurons are segregated into BT and ST using a *k*-means clustering method (with *k* = 2) by comparing the dendritic span and density within the first 200  $\mu$ m from the pia. Ellipsoid areas represent the 95% confidence interval of both clusters.

1217

(C) Ratio of the apical over basal dendritic length for BT and ST neurons (*n* = 14 BT neurons and 13 ST neurons, *P* =  $5.1 \times 10^{-5}$ , Wilcoxon ranked sum test).

1219

(D) Ratio of the apical over basal dendritic branch numbers (*P* = 0.003, Wilcoxon ranked sum test).

1221

(E) Comparison of the depth of the soma from the pial surface of BT and ST neurons (*P* = 0.021, Wilcoxon ranked sum test).

1223

(F) Dendritic density heatmap of BT and ST neurons aligned to the pia (white circle show somata positions).

1225

(G) Examples of long-range projection patterns in S1 after the local injection in POM, VPM and M1 of an AAV vector expressing ChR2-YFP.

1227

(H) Fluorescence intensity profiles of POM, VPM, M1 and S2 long-range projections in S1 (each profile is an average from 3 mice and 2 slices per mouse).

1228



1229 (I) Dendritic density profiles for BT and ST neurons across cortical layers.  
1230 (J) Average of the dot product of each long-range input profiles and the dendritic density of  
1231 each BT and ST neurons (for P<sub>Om</sub>,  $P = 0.002$ ; for VPM,  $P = 0.03$ ; for M1,  $P = 7.7 \times 10^{-5}$ ; for S2,  
1232  $P = 7.7 \times 10^{-5}$ ; Wilcoxon ranked sum test). Error bars, s.e.m.  
1233

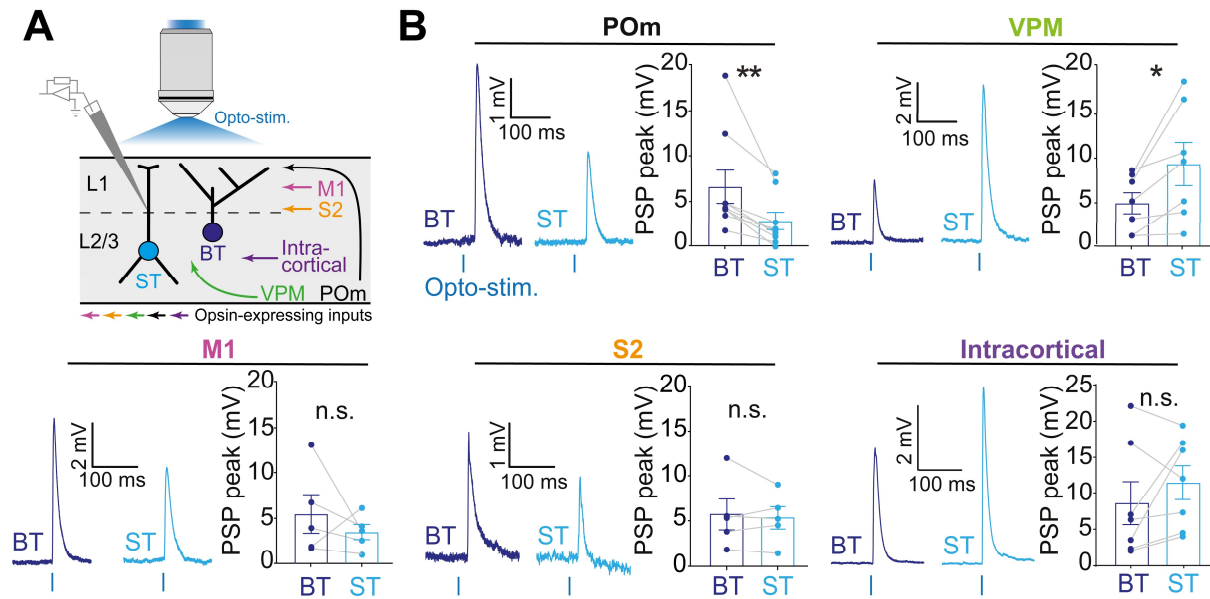

1234

1235

**Figure 2. Single afferent input integration on BT and ST neurons in the S1 form distinct groups based on morphological and electrophysiological features**

1236

1237 (A) Experimental design that consisted in recording the PSP responses of BT and ST neurons  
 1238 upon the photostimulation of various afferent inputs. To account for the variability in  
 1239 expression level of the opsin, a paired comparison between a BT and a ST neuron was  
 1240 performed within each brain slice.

1241 (B) Example traces are shown on the left and averaged PSP peaks were calculated for each  
 1242 recorded pairs on the right. BT neurons exhibited larger responses than ST neurons when  
 1243 POm was stimulated ( $n = 9$  pairs; BT:  $6.5 \pm 1.8$  mV; ST:  $2.8 \pm 0.9$  mV;  $P = 0.004$ , Wilcoxon  
 1244 signed-rank test). However, ST neurons had significantly larger responses than BT neurons  
 1245 when VPM was stimulated ( $n = 7$  pairs; BT:  $4.8 \pm 1.2$  mV; ST:  $9.3 \pm 2.4$  mV;  $P = 0.0154$ ,  
 1246 Wilcoxon signed-rank test). No significant differences were observed when M1, S2 and  
 1247 S1<sub>intracortical</sub> inputs were stimulated (for M1,  $n = 5$  pairs; BT:  $5.3 \pm 2.3$  mV; ST:  $3.4 \pm 3.7$  mV;  $P$   
 1248  $= 0.43$ ; for S2,  $n = 5$  pairs; BT:  $5.7 \pm 1.7$  mV; ST:  $5.3 \pm 1.2$  mV;  $P = 0.94$ , for S1<sub>intracortical</sub>,  $n = 7$   
 1249 pairs; BT:  $7.7 \pm 3.3$  mV; ST:  $12.0 \pm 3.4$  mV;  $P = 0.2$  Wilcoxon signed-rank tests). Error bars,  
 1250 s.e.m.

1251

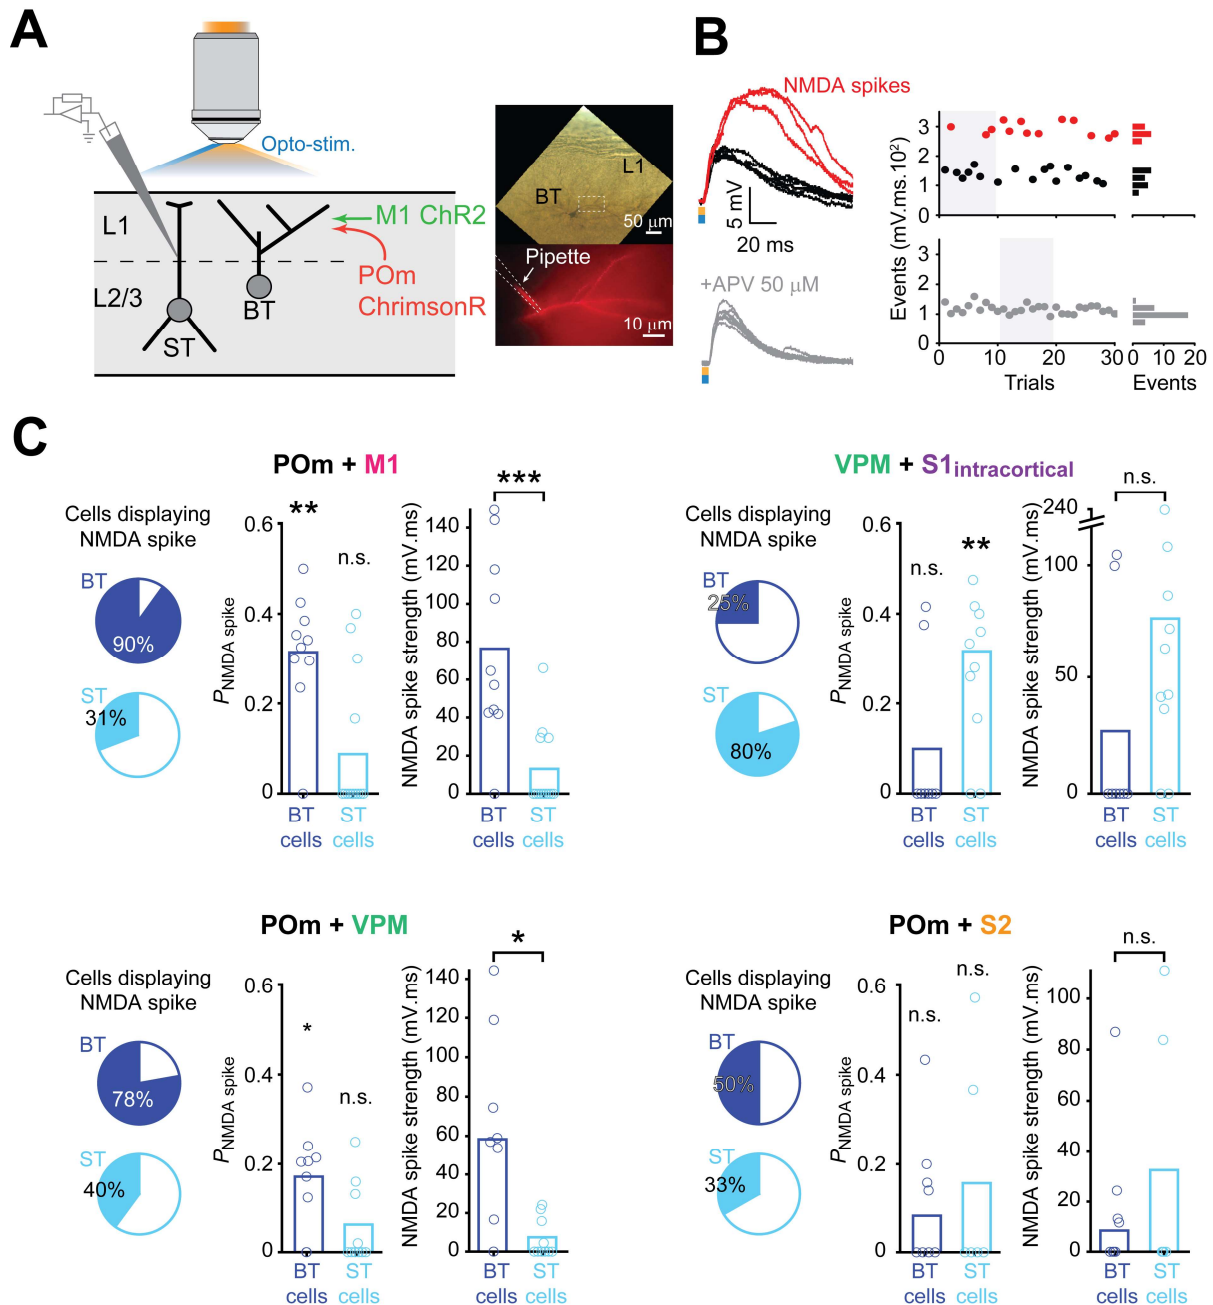

1252

1253

### Figure 3. Cell-type and input specific generation of NMDA spikes in L2/3 neurons

1254 (A) Experimental design for testing the integration of two inputs that converge onto BT and  
 1255 ST neurons in S1. The two inputs expressed different opsins (ChR2 and ChrimsonR) by local  
 1256 injection of AAV vectors. In this example, ChrimsonR was expressed in POM and ChR2 in M1.  
 1257 To ensure accurate recording of distal events, patch-clamp recordings were performed on the  
 1258 apical dendrites of BT or ST neurons.

1259 (B) Examples of events evoked by the co-stimulation of POM and M1 inputs on a BT neuron  
 1260 (top). The stimulation either elicited regular PSPs (black traces) or NMDA spikes (red traces).  
 1261 The bath application of 50 mM APV prevented the generation of NMDA spikes (bottom). The  
 1262 distribution of the size of the events, from this example, showing that NMDA spikes can be  
 1263 easily segregated from regular PSPs (right).

1264 (C) Occurrence of NMDA spikes for four different input combinations. For each of them, the  
 1265 pie charts indicate the percentage of BT and ST cells that displayed NMDA spikes at least once

1266 during the recording period (left). For each of the cell types, the NMDA spike probability per  
1267 trial was compared to the null hypothesis of a zero probability (middle, for POm + M1: BT  
1268 cells,  $n = 10$ ,  $P = 3.9 \times 10^{-3}$ ; ST cells,  $n = 13$ ,  $P = 0.12$ ; for VPM + S1<sub>intracortical</sub>: BT cells,  $n = 8$ ,  $P$   
1269  $= 0.5$ ; ST cells,  $n = 10$ ,  $P = 7.8 \times 10^{-3}$ ; for POm + VPM: BT cells,  $n = 9$ ,  $P = 0.02$ ; ST cells,  $n =$   
1270  $10$ ,  $P = 0.12$ ; for POm + S2: BT cells,  $n = 8$ ,  $P = 0.12$ ; ST cells,  $n = 6$ ,  $P = 0.5$ ; Wilcoxon rank  
1271 sum tests). The NMDA spike strength between BT and ST groups was compared (right, for  
1272 POm + M1:  $P = 8.7 \times 10^{-3}$ ; for VPM + S1<sub>intracortical</sub>:  $P = 0.09$ ; for POm + VPM: BT cells,  $P = 0.054$ ;  
1273 for POm + S2: BT cells,  $P = 0.93$ ; same ns as for the fraction of trials, Wilcoxon sign rank tests).  
1274

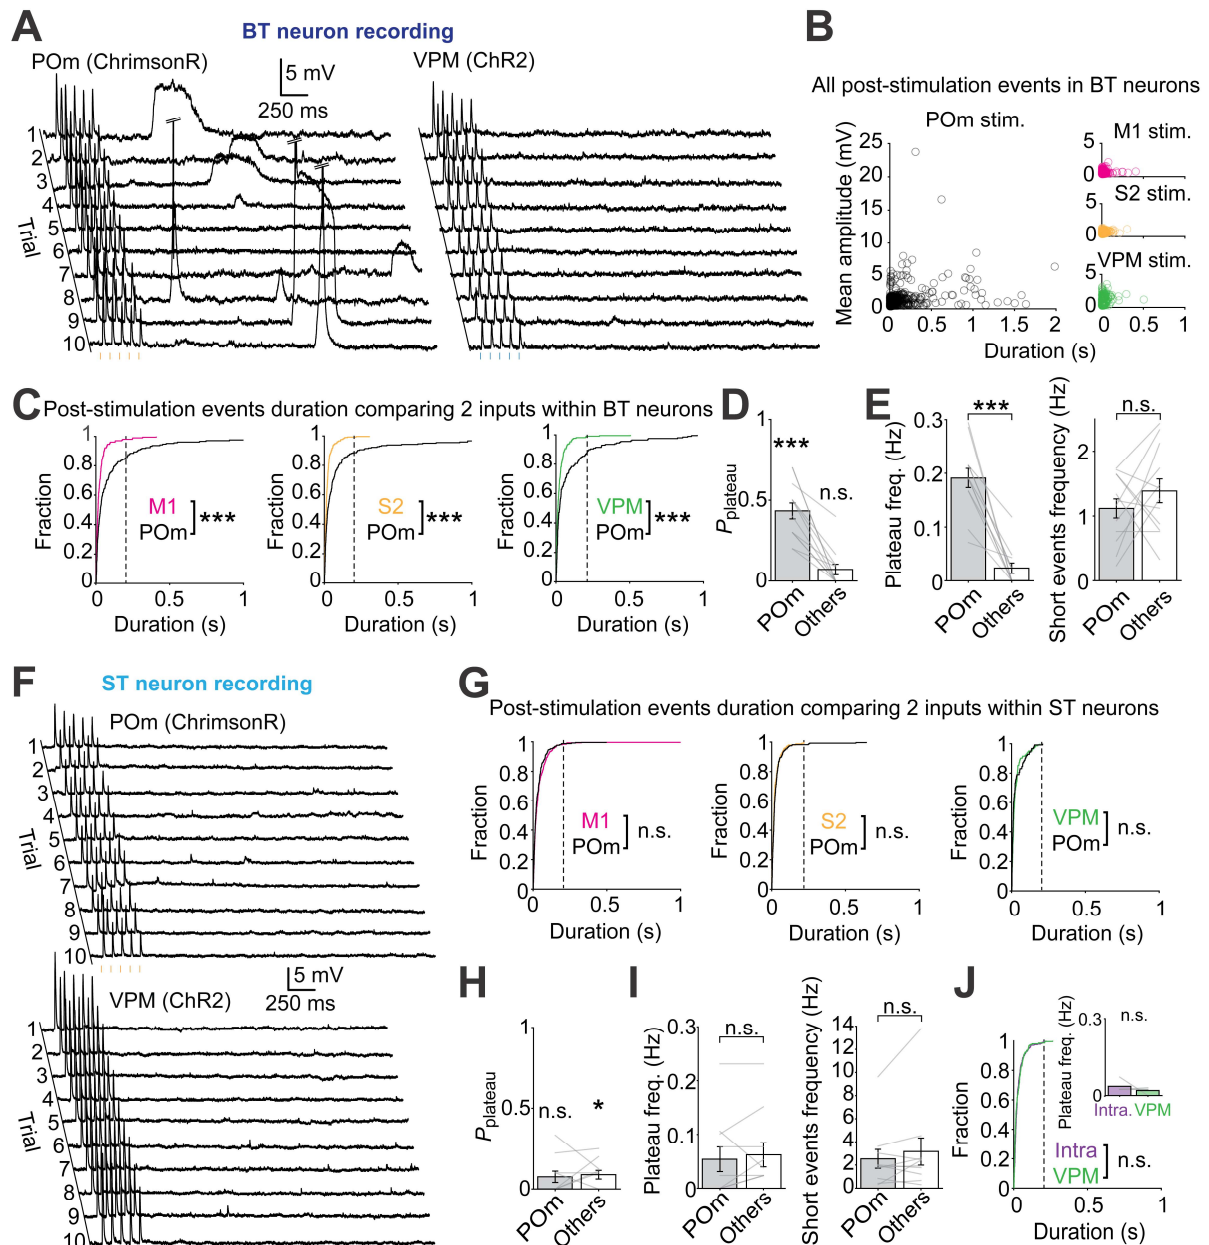

1275

1276

**Figure 4. POM activation induces long-lasting and delayed plateau potentials in BT neurons**

(A) Example traces of the dendritic recording from a BT neuron when POM afferent inputs

expressing ChrimsonR and VPM afferent inputs expressing ChR2 were photostimulated

independently. In both cases, the five pulses of light elicited PSPs. Long-lasting plateau

potentials were regularly observed after POM was stimulated. These events occurred with a

highly variable delay and were not observed following VPM stimulation.

(B) Scatter plots showing the duration and mean amplitude of all post-stimulation events that

were automatically detected in BT neurons. While only short duration events of small

amplitude, corresponding to spontaneous PSPs, were detected following the stimulation of

M1, S2 or VPM, long duration events of variable amplitude were detected following POM

stimulation.

(C) Cumulative fractions of the post-stimulation event durations for POM and another input

(M1, S2 and VPM) in BT neurons (left, M1 vs. POM:  $P = 1.7 \times 10^{-7}$ , S2 vs. POM:  $P = 1.6 \times 10^{-10}$ ,

VPM vs. POM:  $P = 5.5 \times 10^{-5}$ , Koglomorov-Smirnov tests).

1289

1290 (D) Probability of detecting at least one plateau potential following optogenetic stimulation  
1291 of POM and optogenetic stimulation of other M1, S2 and VPM inputs tested against the zero  
1292 probability ( $n = 12$ , for POM:  $P = 4.8 \times 10^{-4}$ ; for others:  $P = 0.06$ , Wilcoxon sign-rank tests).  
1293 (E) Left, plateau potentials frequency in BT neurons for POM compared to other inputs ( $n =$   
1294  $12$ ,  $P = 4.8 \times 10^{-4}$ ; Wilcoxon sign-rank test). Right, same comparison for short events frequency  
1295 ( $P = 0.37$ ; Wilcoxon sign-rank test).  
1296 (F) Example traces of the dendritic recording of an ST neuron after independent  
1297 photostimulation of POM and VPM afferent inputs. No plateau potentials were observed  
1298 when POM or VPM were stimulated.  
1299 (G) Cumulative fractions of the post-stimulation event durations for various pairs of inputs in  
1300 ST neurons (left, M1 vs. POM:  $P = 0.58$ , S2 vs. POM:  $P = 0.35$ , S1<sub>intracortical</sub> vs. VPM:  $P = 0.055$ ,  
1301 VPM vs. POM:  $P = 0.052$ , Koglmorov-Smirnov tests).  
1302 (H) Same analysis as (D) for ST neurons ( $n = 10$ , for POM,  $P = 0.12$ ; for other inputs:  $P = 0.03$ ;  
1303 Wilcoxon sign-rank test).  
1304 (I) Same analysis as (E) for ST neurons ( $n = 10$ , for plateau potential frequency,  $P = 0.62$ ; for  
1305 short events frequency,  $P = 0.32$ , Wilcoxon sign-rank test).  
1306 (J) Cumulative fractions of the post-stimulation event durations for S1<sub>intracortical</sub> and VPM  
1307 inputs in ST neurons ( $P = 0.054$ , Koglmorov-Smirnov tests). Inset shows the plateau  
1308 potentials frequency in ST neurons for this pair of inputs ( $n = 4$ ,  $P = 0.44$ ; Wilcoxon sign-rank  
1309 test).  
1310

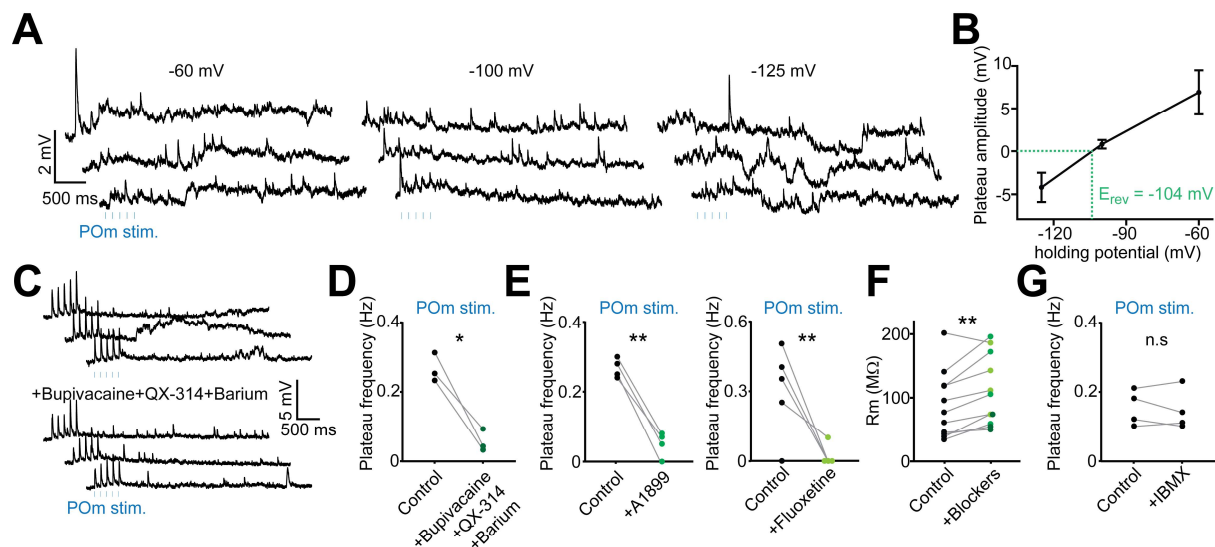

1311

1312

**Figure 5. POM-mediated plateau potentials are due to the closing of K2P channels**

1313 (A) Dendritic recordings of a BT neuron held at different holding potentials during the  
 1314 photostimulation of POM (5 pulses of 1 ms at 8 Hz, every 10 s). Plateau potentials are  
 1315 observed at a holding potential of -60 mV as long-lasting depolarizing events. Applying a  
 1316 holding potential of -125 mV reverted the direction of these events by displaying  
 1317 hyperpolarizing plateau potentials.

1318 (B) Plateau amplitude evoked by the stimulation of POM as a function of the holding potential  
 1319 ( $n = 3$  neurons). The reversing potential of these events was measured at -104 mV consistent  
 1320 with a potassium conductance (see methods).

1321 (C) Dendritic recordings of a BT neuron during the stimulation of POM (5 pulses of 1 ms at 8  
 1322 Hz, every 10 s) before and after bath application of bupivacaine (1 mM), QX-314 (1 mM) and  
 1323 barium (1 mM). No plateau potentials could be observed in the presence of this non-specific  
 1324 blockade of K2P channels.

1325 (D) Plateau potentials frequency was significantly reduced in the presence of non-specific K2P  
 1326 channels blockers ( $n = 3$ ,  $P = 0.023$ , paired t-test).

1327 (E) The selective blockade of TASK or TREK channels using A1899 (100 nM) or fluoxetine (100  
 1328  $\mu$ M) respectively, largely prevented the generation of plateau potentials (for A1899,  $n = 4$ ,  $P$   
 1329  $= 0.001$ ; for fluoxetine,  $n = 5$ ,  $P = 0.005$ , paired t-tests).

1330 (F) Altogether, the K2P blockers used in D and E significantly increase the membrane  
 1331 resistance of the recorded dendrites ( $n = 11$ ,  $P = 0.004$ , paired t-test).

1332 (G) Blocking the THIK channel family with IBMX (1 mM) did not produce any change in the  
 1333 frequency of plateau potentials ( $n = 4$ ,  $P = 0.62$ , paired t-test).

1334

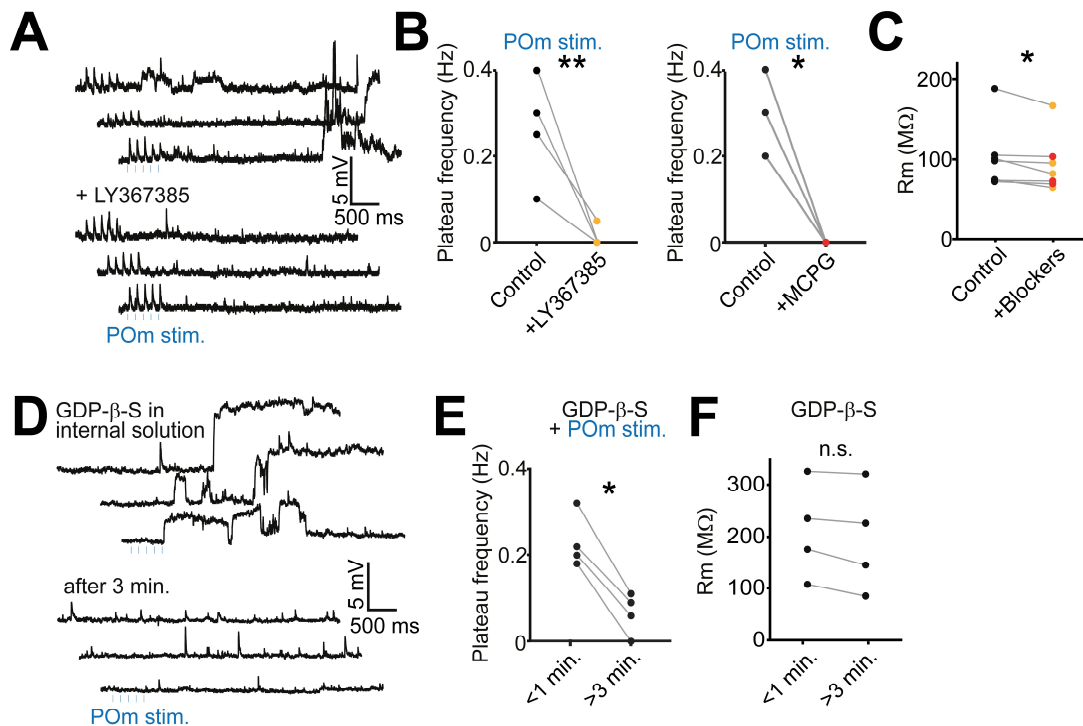

1335

1336

**Figure 6. POM-mediated plateau potentials are mediated by the activation of mGluRs**

1337 (A) Dendritic recordings of a BT neuron during the stimulation of POM before and after the  
1338 bath application of LY367385 (50  $\mu$ M), a specific mGluR1 blocker. The drug prevented the  
1339 generation of plateau potentials.

1340 (B) The plateau frequency was mostly prevented in the presence of LY367385 (50  $\mu$ M;  $n = 4$ ,  
1341  $P = 0.003$ , paired t-test) as well as in the presence of the generic mGluR1 blocker MCPG (500  
1342  $\mu$ M;  $n = 3$ ,  $P = 0.03$ , paired t-test).

1343 (C) Together, the mGluR1 blockers LY367385 and MCPG significantly decrease the membrane  
1344 resistance of the recorded dendrites ( $n = 7$ ,  $P = 0.04$ , paired t-test).

1345 (D) Dendritic recording of a BT neuron during the stimulation of POM in the presence of GDP-  
1346  $\beta$ -S (1 mM), a G-protein activity blocker, in the intracellular solution. Within the first minute  
1347 after break-in, plateau potentials could be observed but were not visible after 3 minutes,  
1348 consistent with the dialysis of the drug.

1349 (E) The frequency of plateau potentials was largely reduced after intracellular dialysis of GDP-  
1350  $\beta$ -S ( $n = 4$ ,  $P = 0.003$ , paired t-test).

1351 (F) The dialysis of GDP- $\beta$ -S did not significantly reduce the membrane resistance of the  
1352 dendrite ( $n = 4$ ,  $P = 0.066$ , paired t-test).

1353



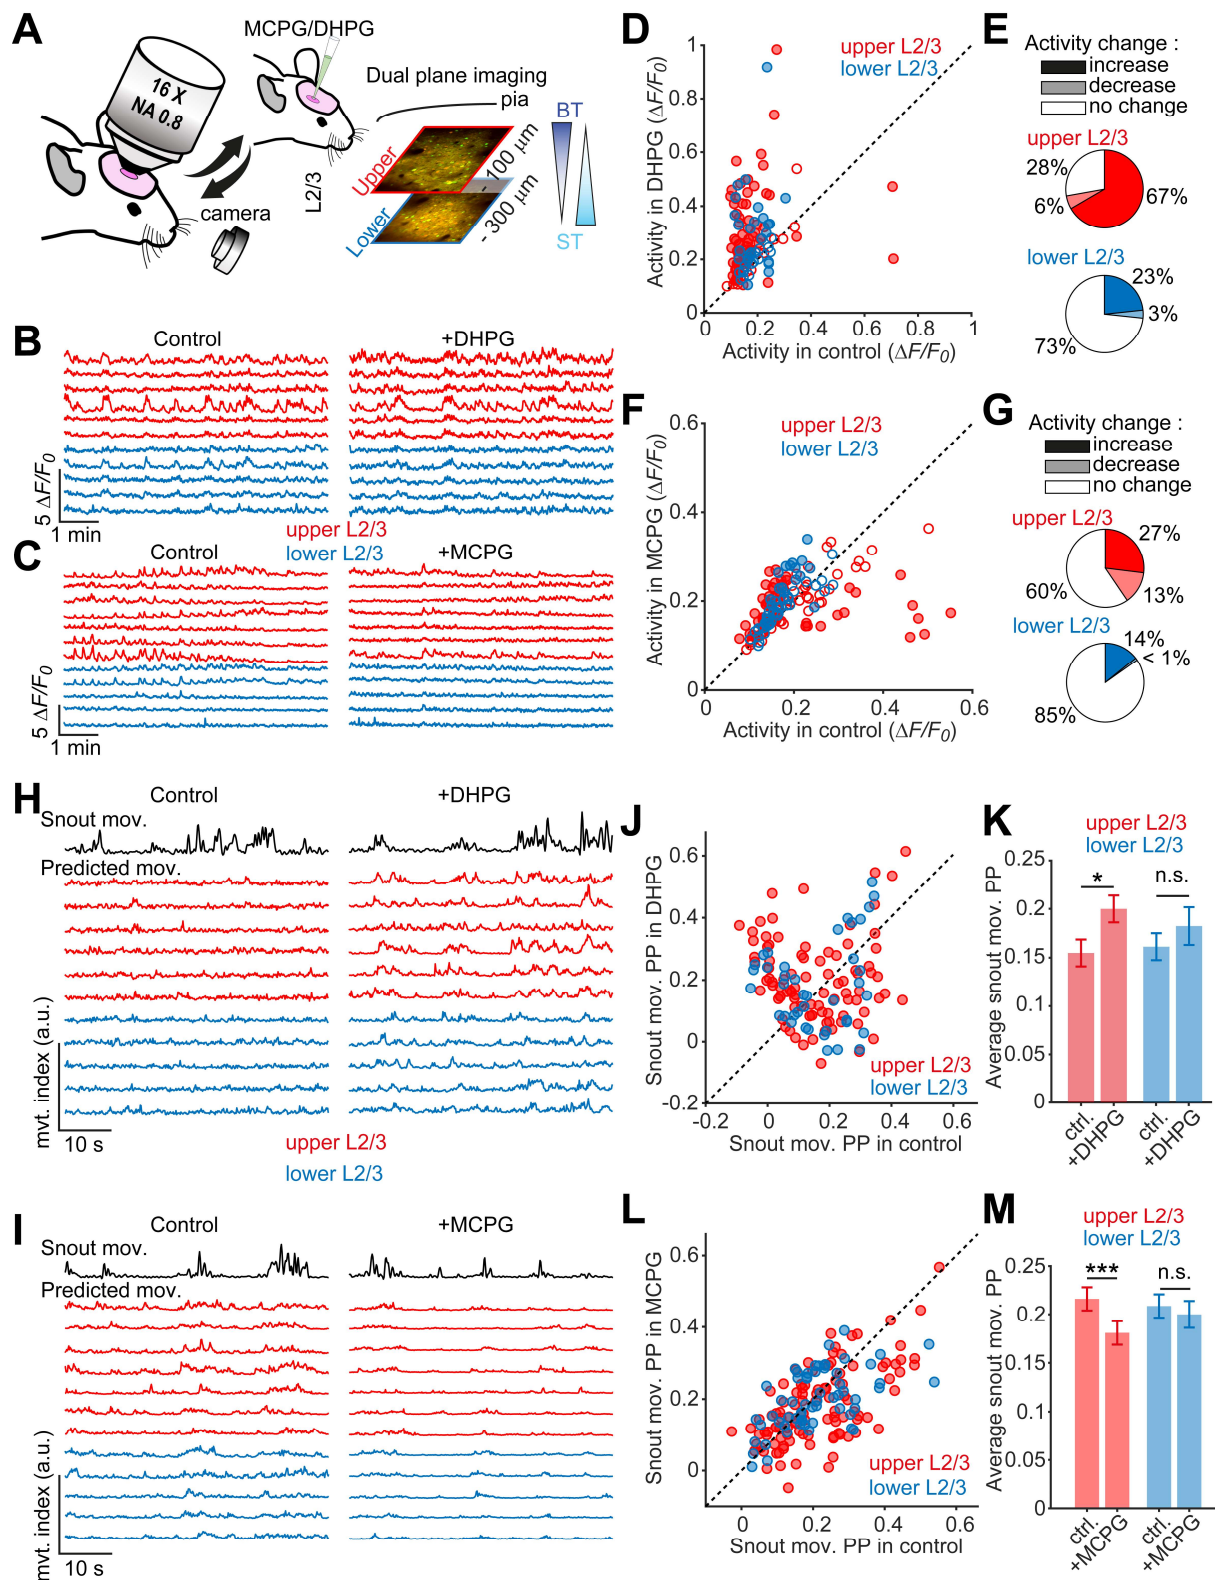

1354

1355

1356

1357

1358

1359

1360

**Figure 7. Modulation of mGluR1s *in vivo* bidirectionally changes the integration of movement-related information in upper L2/3 neurons**

(A) *In vivo* 2-photon calcium imaging was performed before and after injection of DHPG or MCPG in the barrel cortex directly through the silicone port of the cranial window. Upper and lower L2/3 neurons expressing GCaMP6s and mRuby2 were recorded quasi-simultaneously at -100 and -300  $\mu\text{m}$ , respectively, from the pial surface.

1361 (B) Example traces of upper (red) and lower (blue) L2/3 neurons before and after injection of  
1362 DHPG.  
1363 (C) Same as (B), before and after injection of MCPG.  
1364 (D) Comparison of the average normalized activity during the baseline recording and after  
1365 DHPG injection for the upper (red,  $n = 90$  neurons) and lower (blue) L2/3 neurons ( $n = 40$   
1366 neurons, from 5 mice). Neurons that changed their activity level (closed circles) were  
1367 determined with a permutation test ( $P < 0.01$ ), shuffling data points between baseline and  
1368 after drug injection and exhibiting at least a small effect size (Cohen's  $d > 0.2$ ). Other neurons  
1369 were considered to not change their activity level (open circles).  
1370 (E) Fractions of neurons showing an increase, decrease or no change in activity level after  
1371 DHPG injection for the upper (red) and lower (blue) L2/3 neurons.  
1372 (F) Same analysis as (D) for MCPG injection ( $n = 104$  upper and 61 lower L2/3 neurons, from  
1373 3 mice).  
1374 (G) Fractions of neurons showing activity change after MCPG injection.  
1375 (H) and (I) A random forests model was used to evaluate the ability of individual L2/3 neurons  
1376 to predict the snout movement before and after DHPG (H) or MCPG (I) injection. Predicted  
1377 snout movements of the neurons shown in (B) and (C) were displayed (upper L2/3 neurons in  
1378 red and lower L2/3 neurons in blue) and compared to the actual snout movement (top black  
1379 trace).  
1380 (J) Comparison of the snout movement PP (determined as the Pearson's correlation between  
1381 predicted and actual traces) in baseline and after DHPG injection ( $n = 90$  upper and 40 lower  
1382 L2/3 neurons, from 5 mice).  
1383 (K) Average snout movement PP in baseline and after DHPG injection for the upper (red) and  
1384 lower (blue) L2/3 neurons. Snout movement PP increased for the upper L2/3 neurons (paired  
1385 t-test,  $P = 0.026$ ) but not for the lower L2/3 neurons ( $P = 0.44$ ).  
1386 (L) Same analysis as (J) but for MCPG injection ( $n = 104$  upper and 61 lower L2/3 neurons,  
1387 from 3 mice).  
1388 (M) Same as for (K) for MCPG injection. Snout movement PP decreased for the upper L2/3  
1389 neurons but not for the lower L2/3 neurons (for upper L2/3 neurons:  $P = 4e-4$ ; for lower L2/3  
1390 neurons:  $P = 0.46$ ; paired t-tests).  
1391
